# Supplementary material for: MiR-4521 plays a tumor repressive role in growth and metastasis of hepatocarcinoma cells by suppressing phosphorylation of FAK/AKT pathway via targeting FAM129A
Source: PubMed Central journal article supplement — J Adv Res. 2021 May 12;36:147–61. doi: 10.1016/j.jare.2021.05.003 (PMC8799875; doi:10.1016/j.jare.2021.05.003), 2021-05-12
Supplement: mmc2.pdf [file mmc2.pdf]

## Supplementary material

### S1. Replicates of western blots

#### 1.1 Figure 1(F), original blots

Expression of FAM129A in non-transfected cells (HepG2, HCCLM3) compared with normal LO2.

Experiment no.1

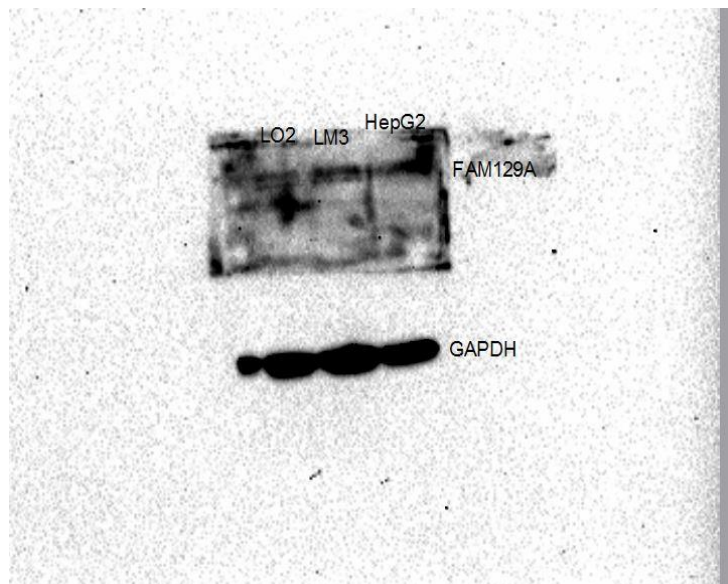

*Exp.1 Expression of FAM129A in LO2, LM3 & HEPG2 with GAPDH*

## Experiment no.2

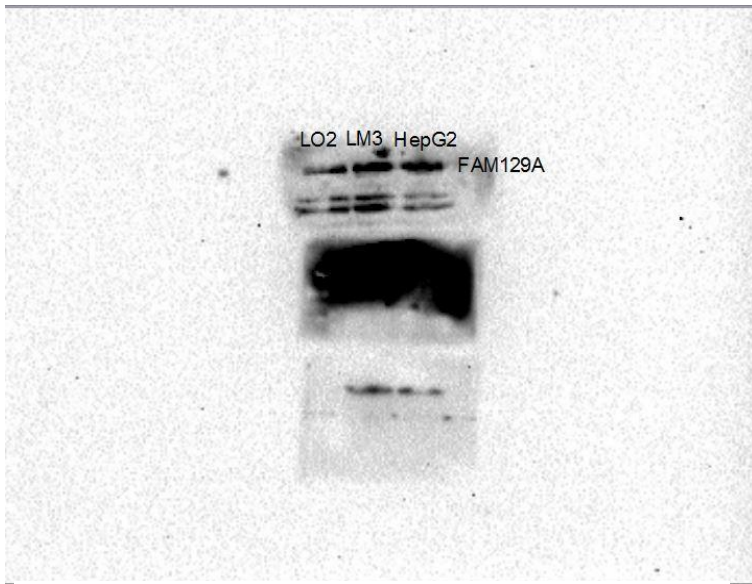

*Exp.2 Expression of FAM129A in LO2, LM3 & HEPG2*

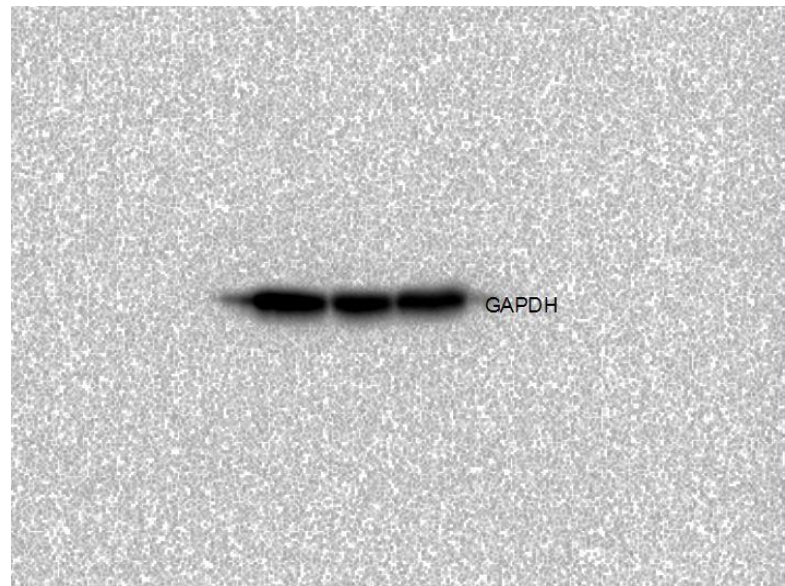

*GAPDH for Exp.2*

## Experiment no.3

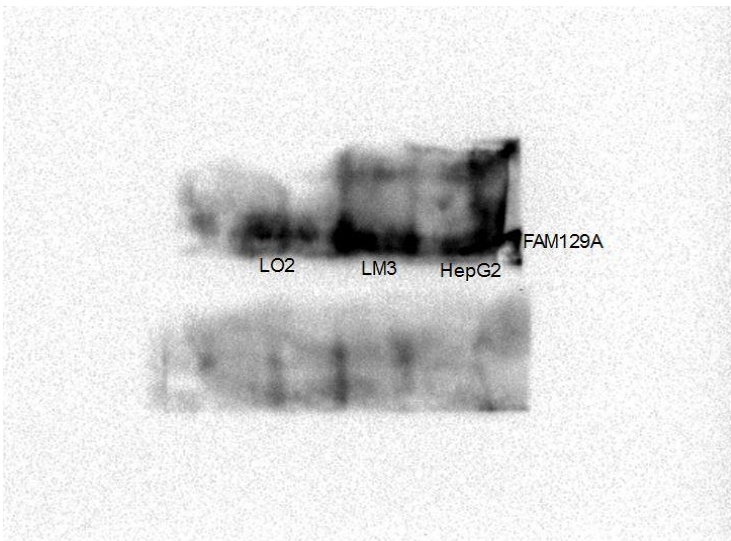

*Exp.3 Expression of FAM129A in LO2, LM3 & HEPG2*

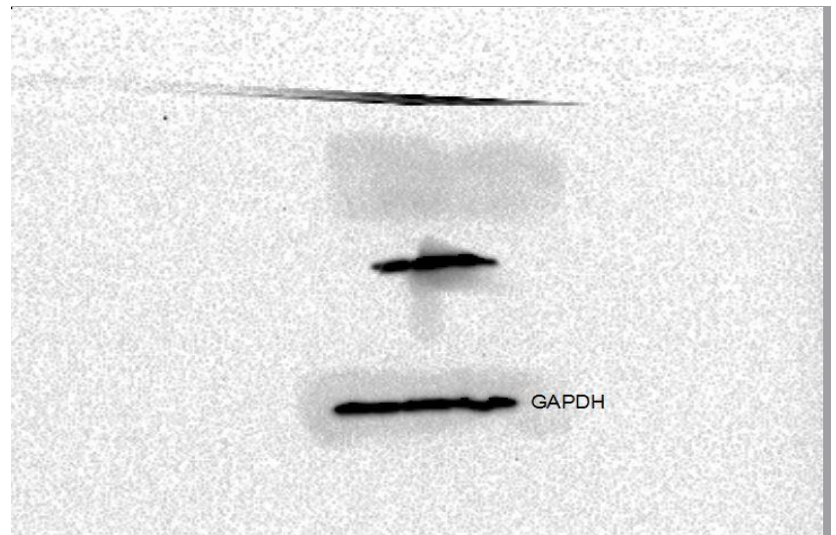

*GAPDH for Exp.3*

## 1.2 Figure 2 (C), original blots

Expression of FAM129A at 24 and 48h in HCCLM3 and HepG2 cells transfected with mimic-4521

HCCLM3 transfected by miR-4521 mimic

Experiment no.1

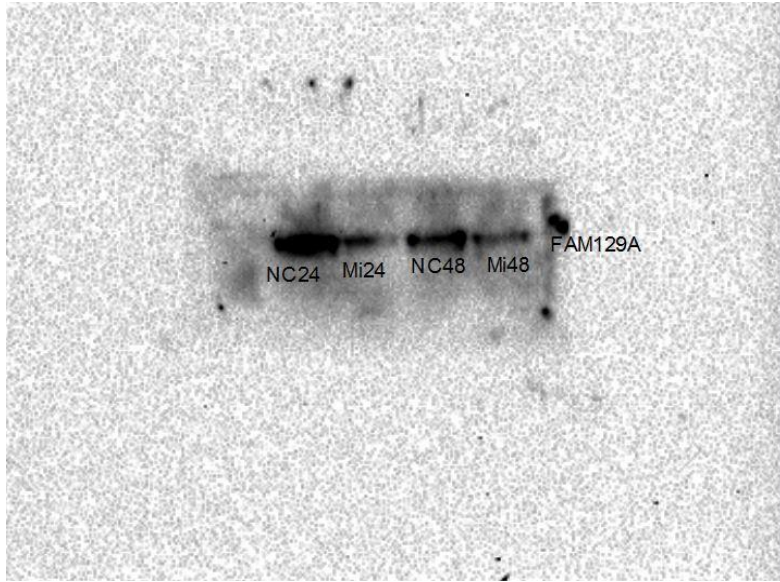

Exp.1 Expression of FAM129A in miR-4521 mimics transfected LM3 at 24,48h

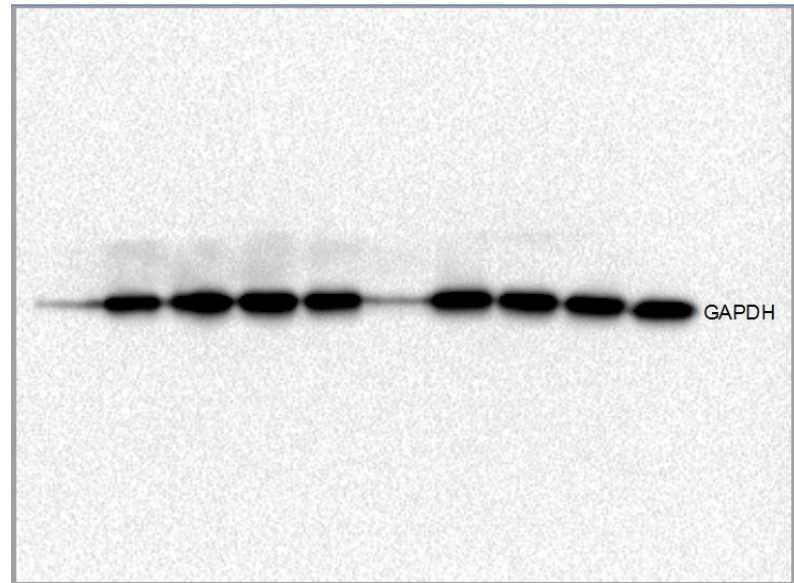

GAPDH for Exp.1

Experiment no.2

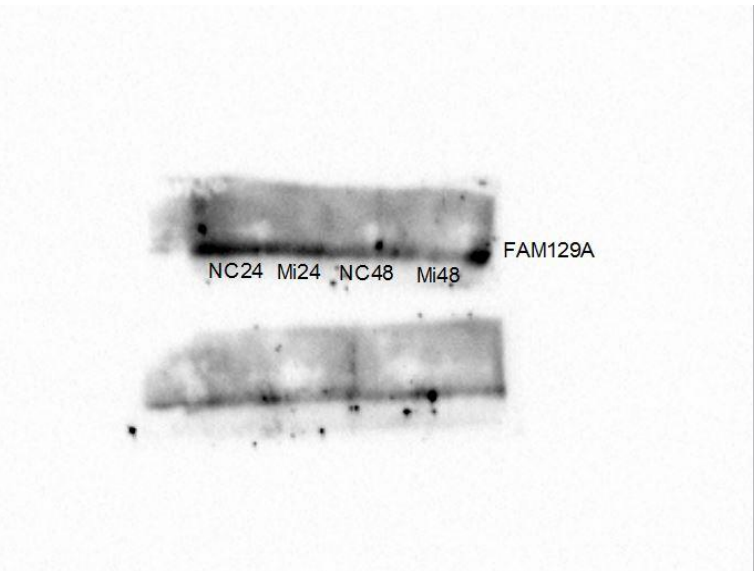

Exp.2 Expression of FAM129A in miR-4521 mimics transfected LM3 at 24,48h

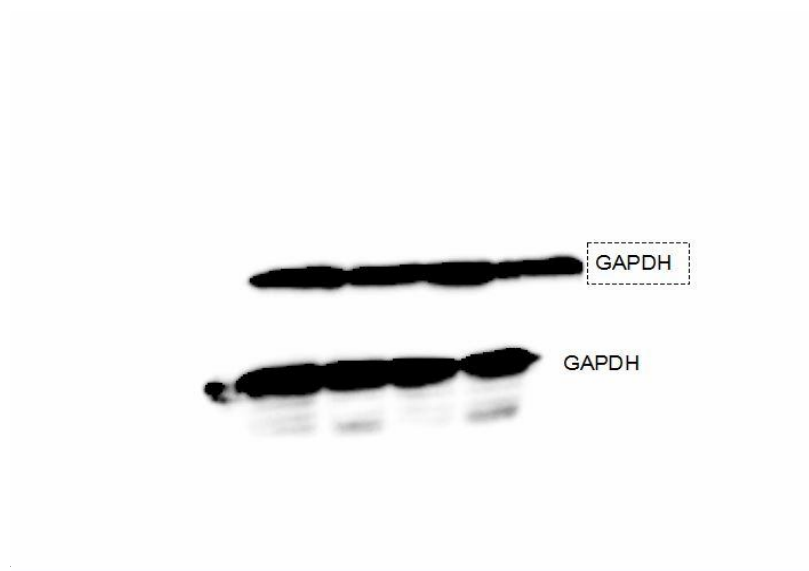

GAPDH for Exp.2



### Experiment no.3

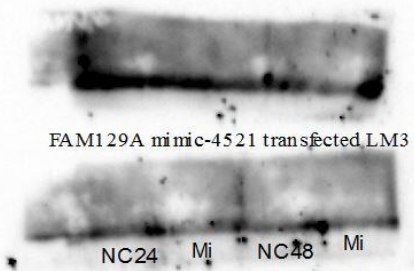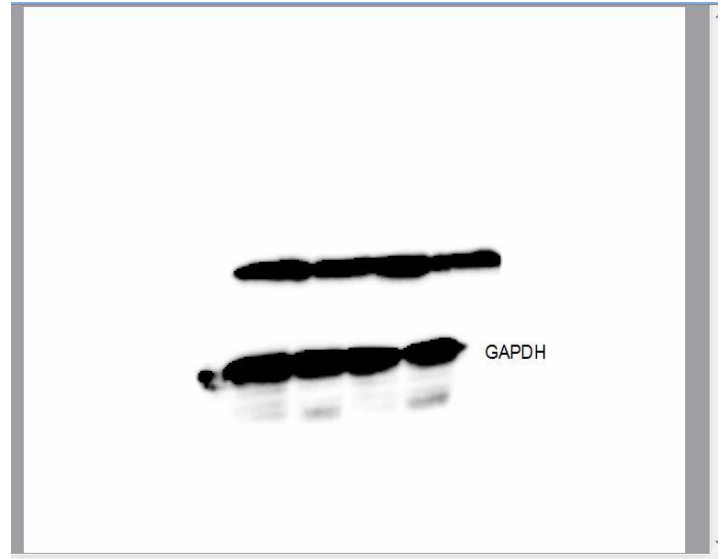

GAPDH for Exp.3

Exp.3 Expression of FAM129A in miR-4521 mimics transfected LM3 at 24,48h

### HepG2 transfected by miR-4521 mimic

### Experiment no.1

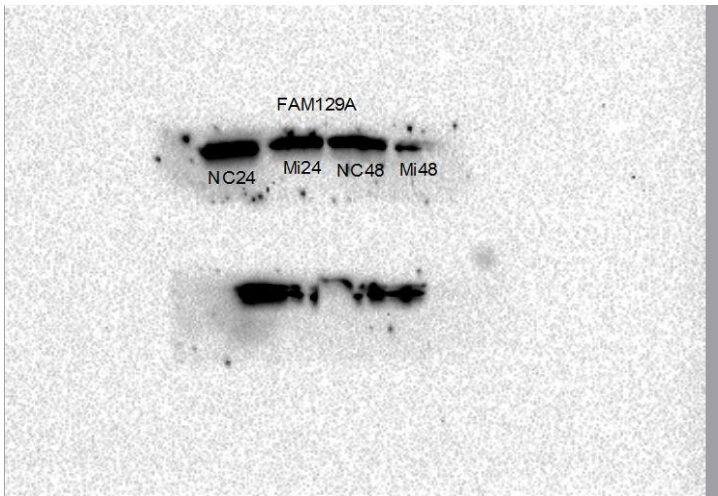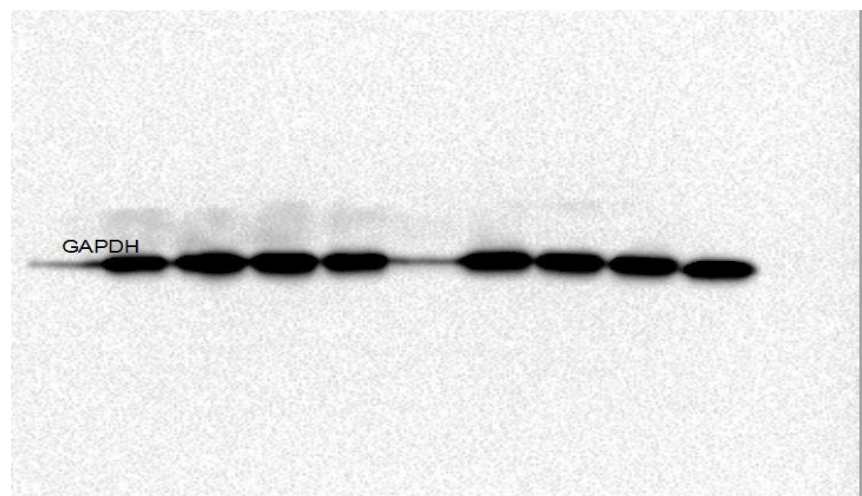

GAPDH for Exp.1

Exp.1 Expression of FAM129A in miR-4521 mimics transfected HEPG2 at 24,48h



Experiment no.2

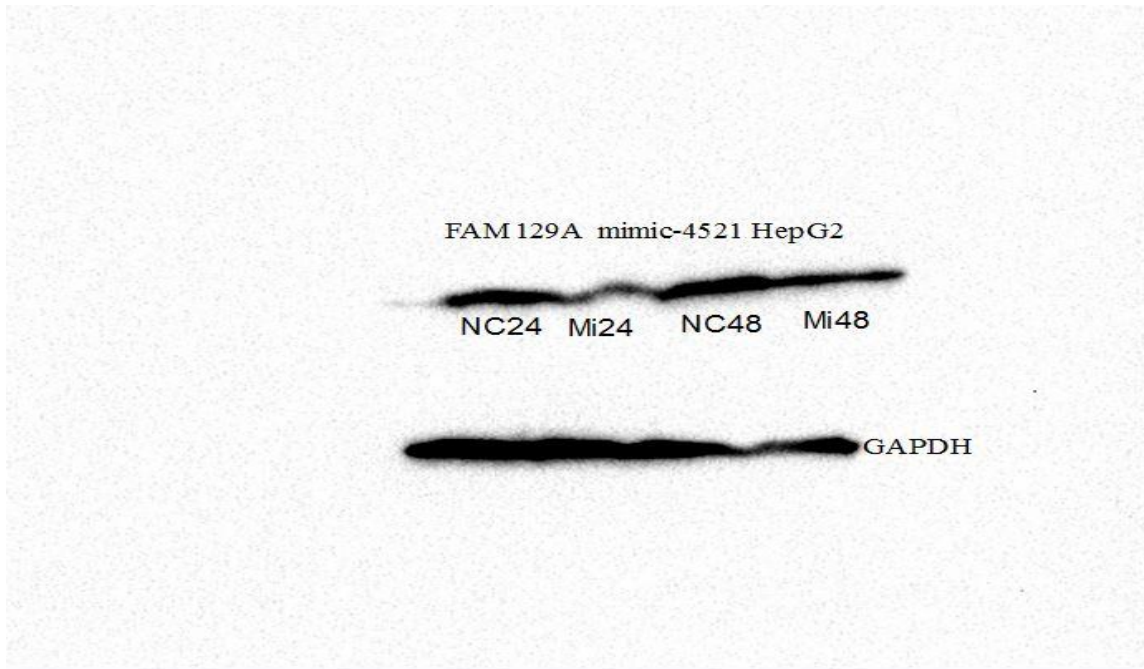

Exp.2 Expression of FAM129A in miR-4521 mimics transfected HEPG2 at 24,48h with GAPDH

Experiment no.3

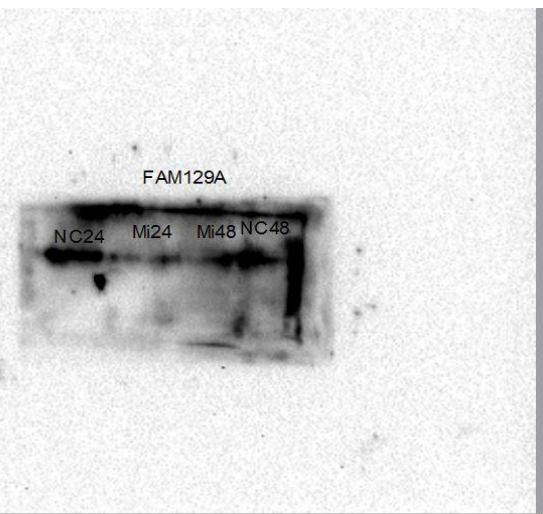

Exp.3 Expression of FAM129A in miR-4521 mimics transfected HEPG2 at 24,48h

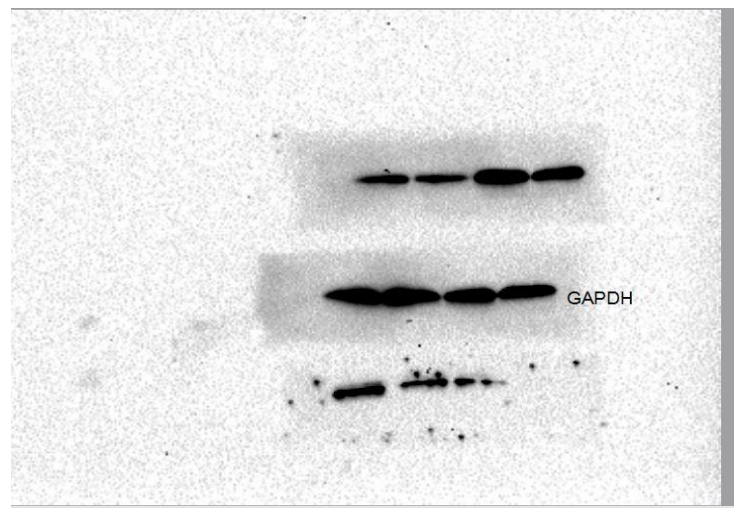

GAPDH for Exp.3

1.3 Figure 4 (A, B), original blots

Expression of FAM129A at 24h and 48h in HCCLM3 and HepG2 cells transfected with si-FAM129A

HCCLM3 transfected by si-FAM129A

Experiment no.1

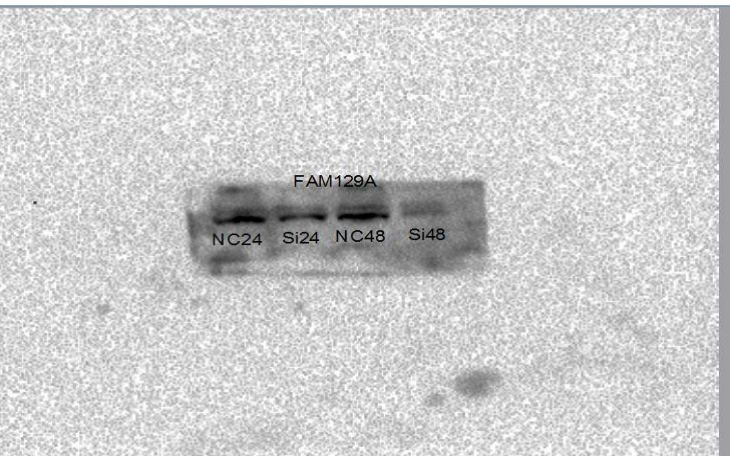

Exp.1 Expression of FAM129A in si-FAM129A transfected LM3 at 24,48h

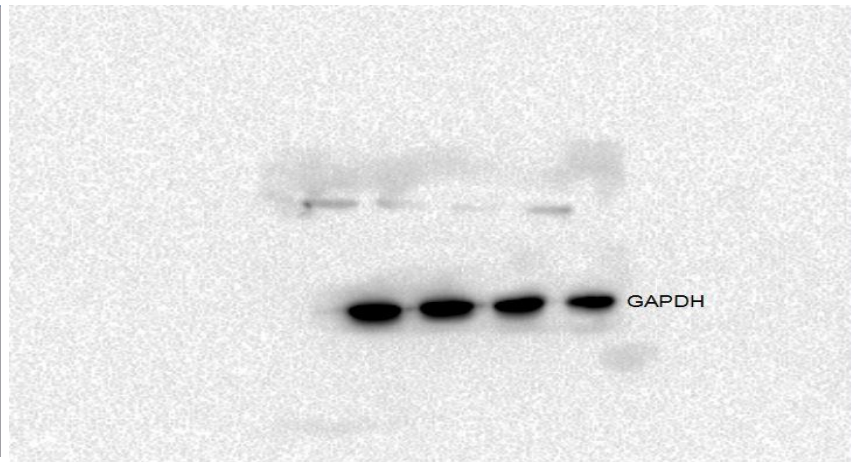

GAPDH for Exp.1

Experiment no.2

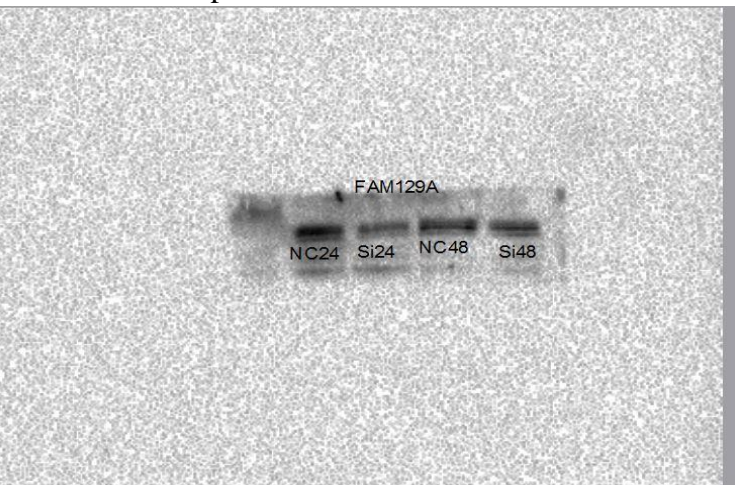

Exp.2 Expression of FAM129A in si-FAM129A transfected LM3 at 24,48h

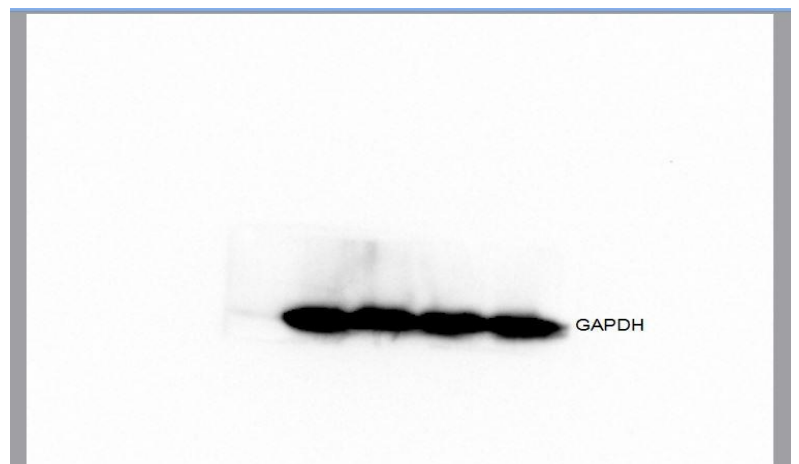

GAPDH for Exp.2



### Experiment no.3

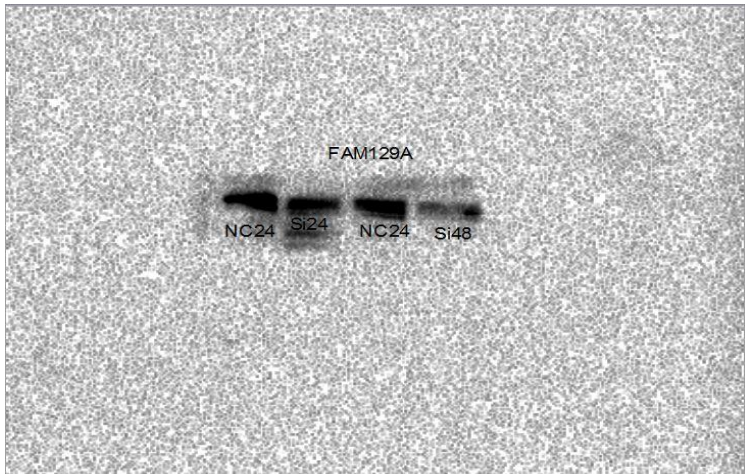

Exp.3 Expression of FAM129A in si-FAM129A transfected LM3 at 24,48h

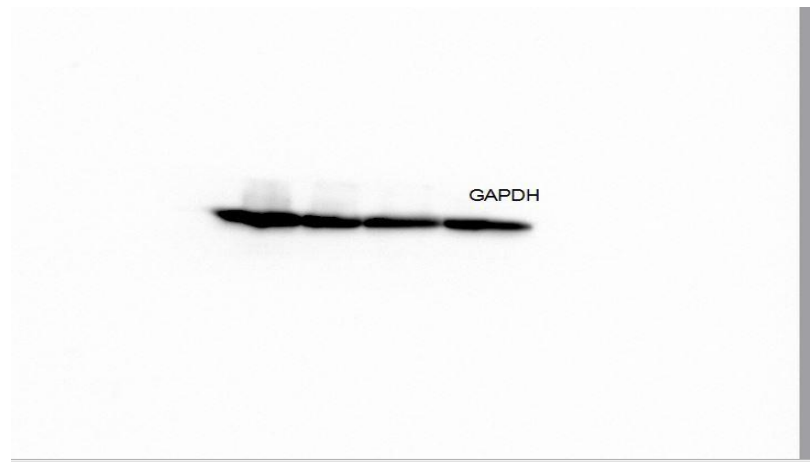

GAPDH for Exp.3

### HepG2 transfected by si-FAM129A

### Experiment no.1

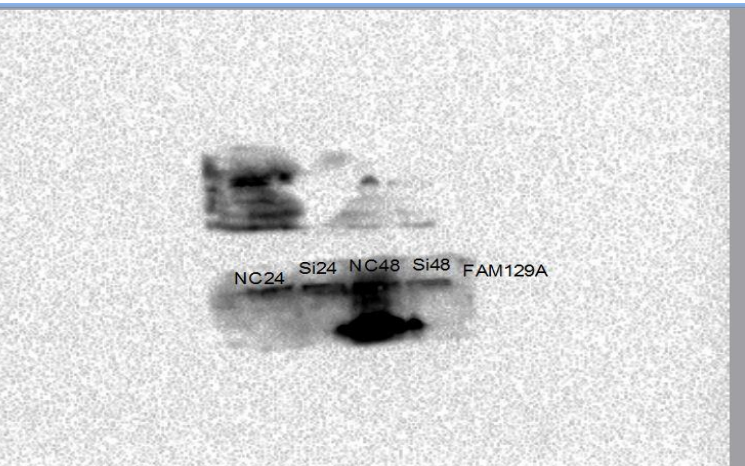

Exp.1 Expression of FAM129A in si-FAM129A transfected HEPG2 at 24,48h

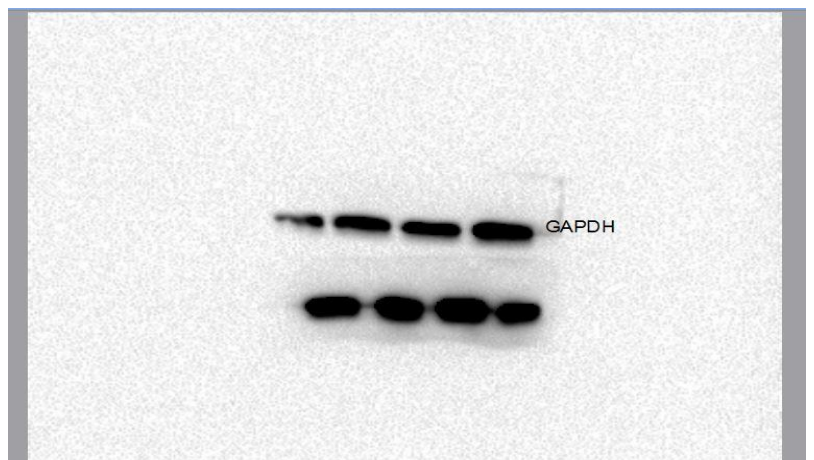

GAPDH for Exp.1



## Experiment no.2

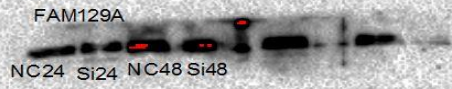

FAM129A  
NC24 Si24 NC48 Si48

Detailed description: This Western blot shows FAM129A protein levels. The top row of bands is labeled 'FAM129A'. Below the bands, the lanes are labeled 'NC24', 'Si24', 'NC48', and 'Si48'. The Si24 and Si48 lanes show significantly reduced band intensity compared to the NC24 and NC48 lanes, indicating successful knockdown of FAM129A.

*Exp.2 Expression of FAM129A in si-FAM129A transfected HEPG2 at 24,48h*

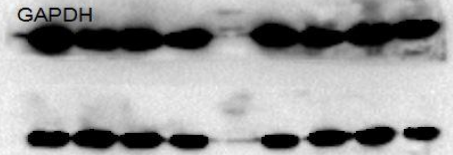

GAPDH

Detailed description: This Western blot shows GAPDH protein levels as a loading control. The bands are labeled 'GAPDH'. There are four lanes corresponding to the conditions in Experiment 2. The bands are of similar intensity across all lanes, indicating equal protein loading.

*GAPDH for Exp.2*

## Experiment no.3

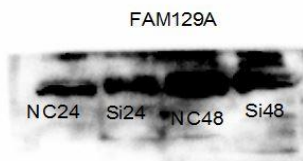

FAM129A  
NC24 Si24 NC48 Si48

Detailed description: This Western blot shows FAM129A protein levels. The top row of bands is labeled 'FAM129A'. Below the bands, the lanes are labeled 'NC24', 'Si24', 'NC48', and 'Si48'. The Si24 and Si48 lanes show significantly reduced band intensity compared to the NC24 and NC48 lanes, indicating successful knockdown of FAM129A.

*Exp.3 Expression of FAM129A in si-FAM129A transfected HEPG2 at 24,48h*



GAPDH

Detailed description: This Western blot shows GAPDH protein levels as a loading control. The bands are labeled 'GAPDH'. There are four lanes corresponding to the conditions in Experiment 3. The bands are of similar intensity across all lanes, indicating equal protein loading.

*GAPDH for Exp.3*

1.4 Figure 5 (A, B, C, D and E), original blots

Expression of signaling protein transfected with miR-4521 mimics in HCCLM3 and HepG2 cells.

A.

HCCLM3

Experiment no.1, 2 & 3

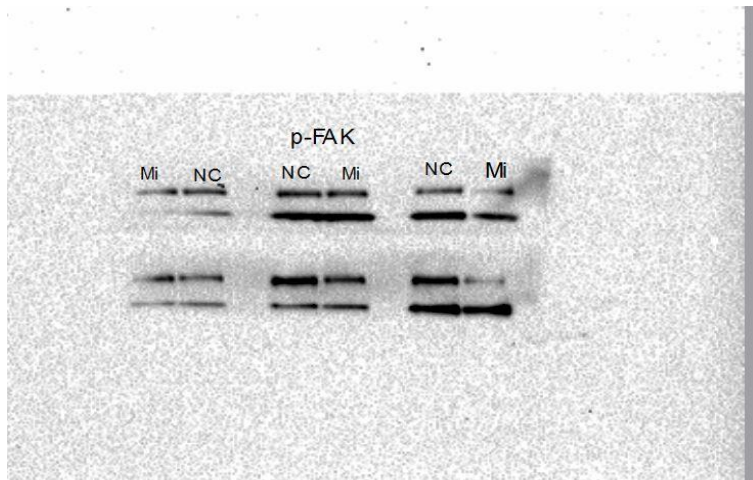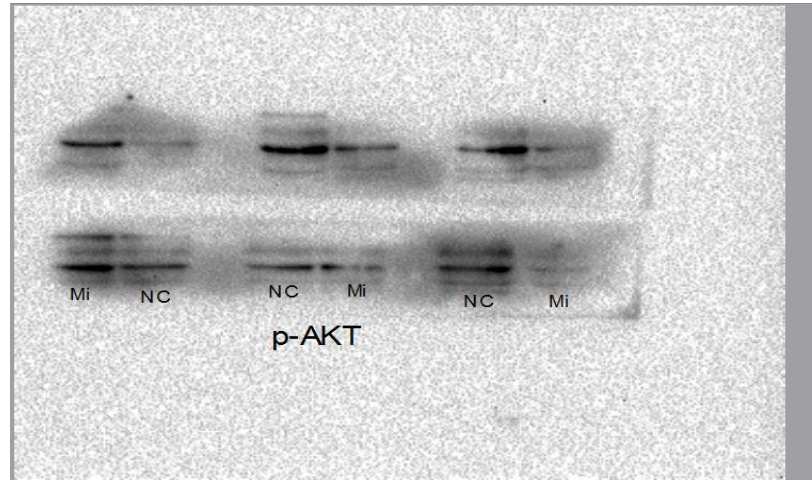

Exp.1,2&3 Expression of p-FAK in miR-4521 mimics transfected LM3

Exp.1,2&3 Expression of p-AKT in miR-4521 mimics transfected LM3

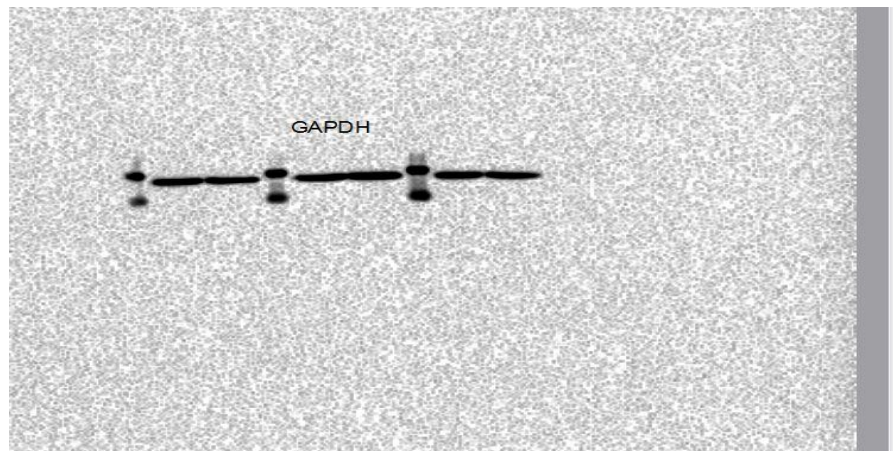

GAPDH for Exp.1,2 & 3



HepG2

Experiment no.1, 2 & 3

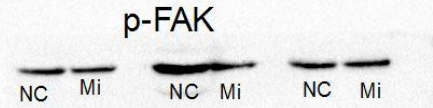

*Exp.1,2&3 Expression of p-FAK in miR-4521 mimics transfected HEPG2*

GAPDH

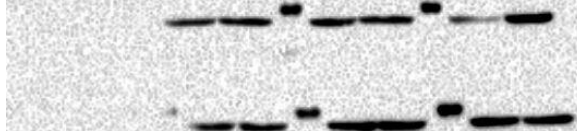

*GAPDH for Exp.1, 2 & 3*

Experiment no.1, 2

NC Mi NC Mi  
p-AKT

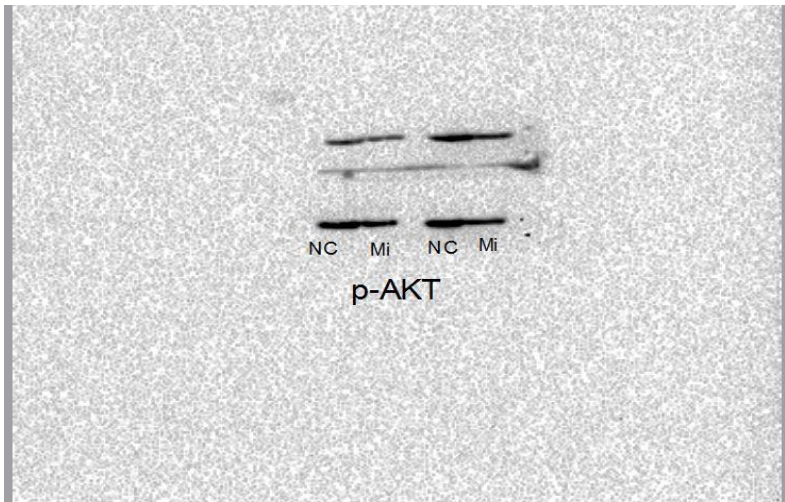

*Exp.1,2 Expression of p-AKT in miR-4521 mimics transfected HEPG2*

GAPDH

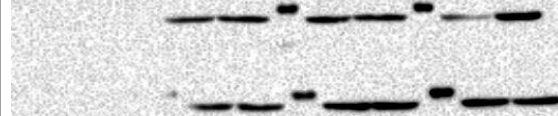

*GAPDH for Exp.1, 2*



### Experiment No.3

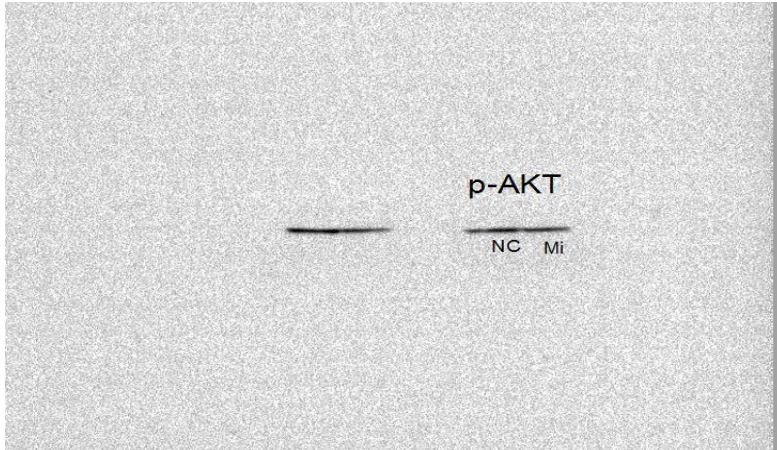

Exp.3 Expression of p-AKT in miR-4521 mimics transfected HEPG2

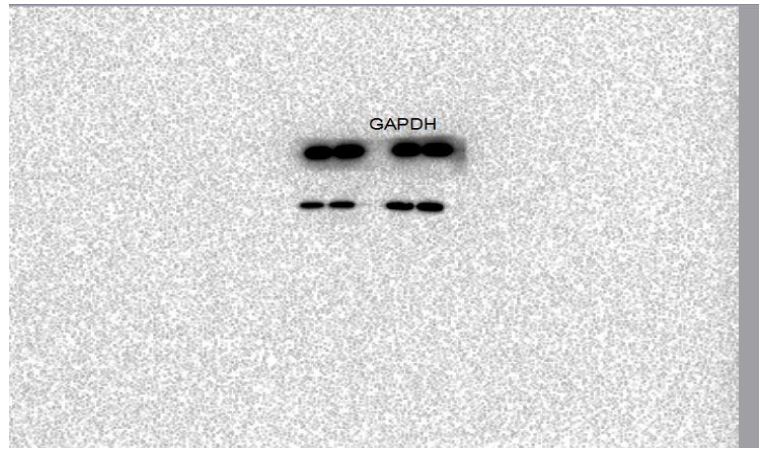

GAPDH for Exp.3

### B.

### HCCLM3

### Experiment no.1, 2 & 3

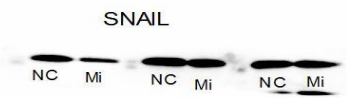

Exp.1,2 & 3 Expression of SNAIL in miR-4521 mimics transfected LM3

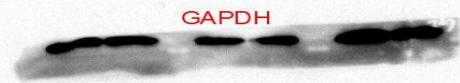

GAPDH for Exp.1,2& 3

### Experiment no.1, 2

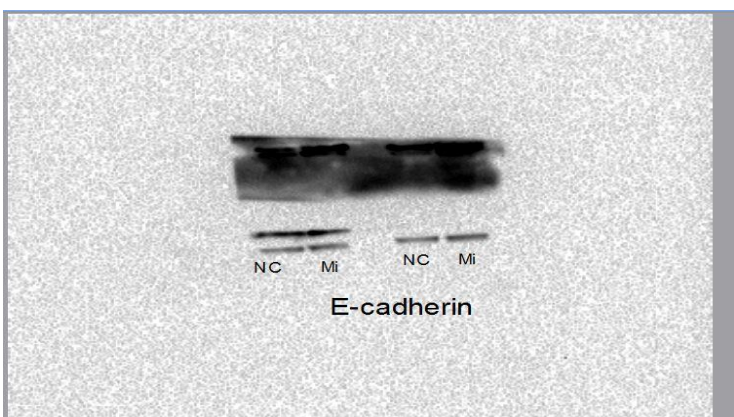

*Exp.1,2 Expression of E-cadherin in miR-4521 mimics transfected LM3*

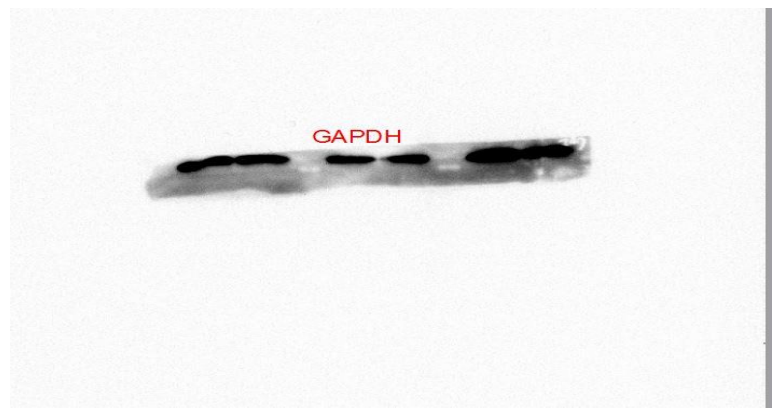

*GAPDH for Exp.1, 2*

### Experiment No.3

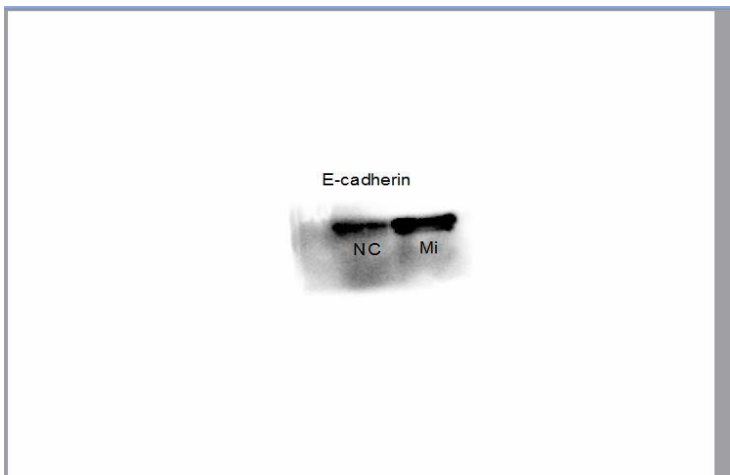

*Exp.3 Expression of E-cadherin in miR-4521 mimics transfected LM3*

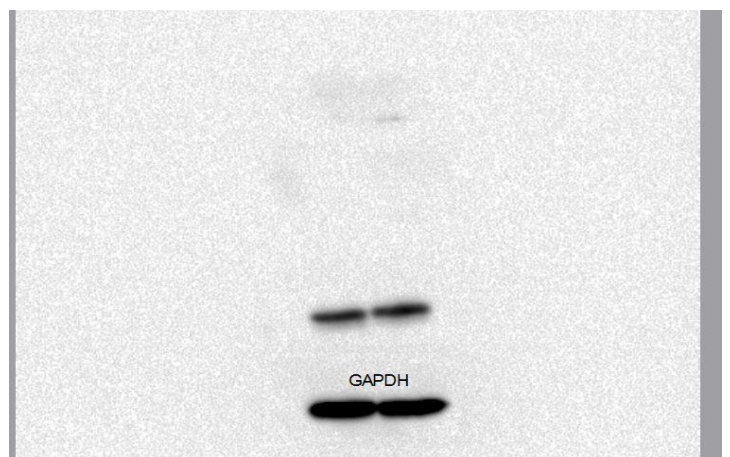

*GAPDH for Exp.3*

Experiment no.1, 2 & 3

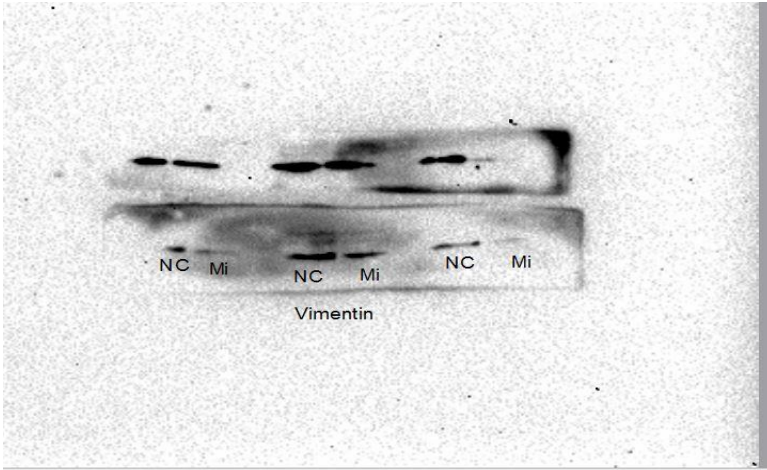

Exp.1,2 & 3 Expression of Vimentin in miR-4521 mimics transfected LM3

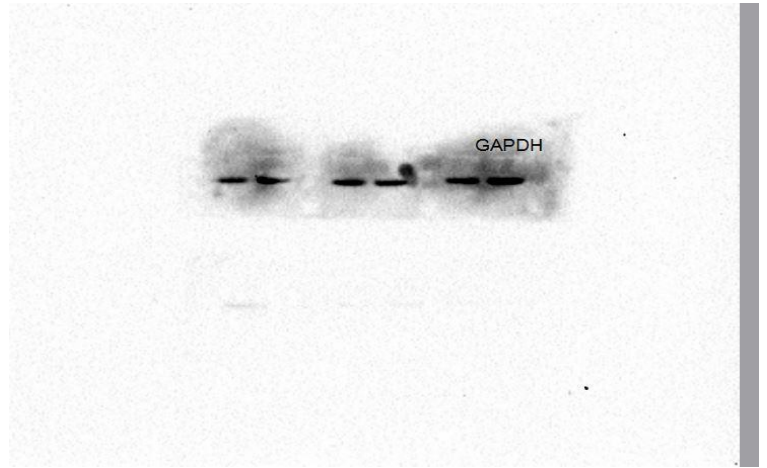

GAPDH for Exp.1,2& 3

Experiment no.1, 2

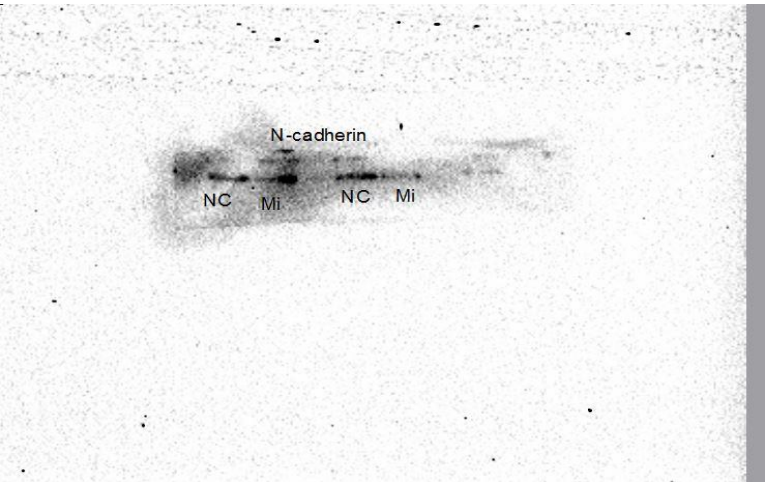

Exp.1,2 Expression of N-cadherin in miR-4521 mimics transfected LM3

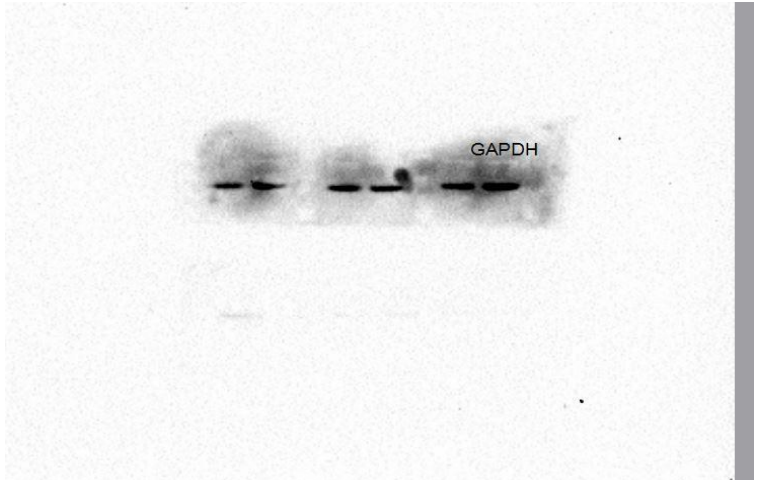

GAPDH for Exp.1, 2



### Experiment N0.3

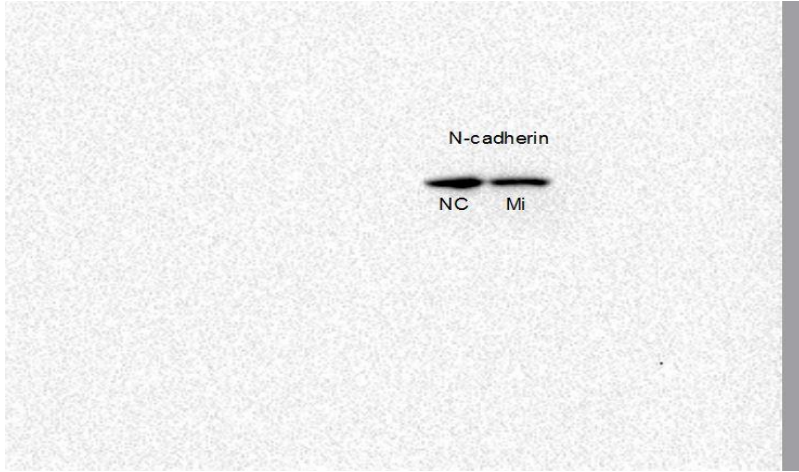

Exp.3 Expression of N-cadherin in miR-4521 mimics transfected LM3

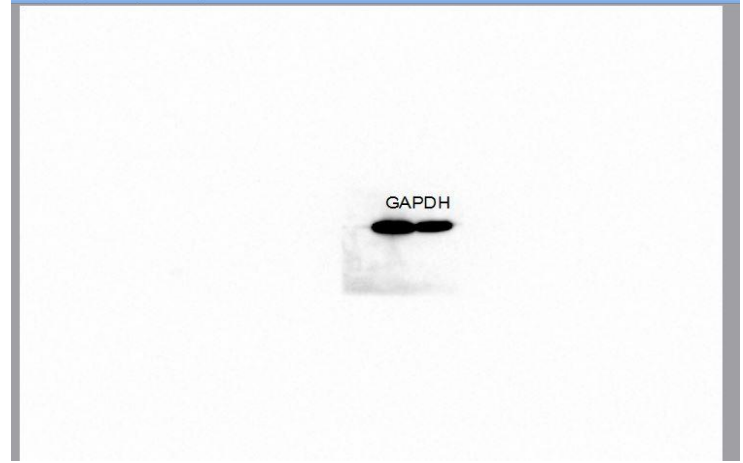

GAPDH for Exp.3

### HepG2

#### Experiment N0.1,2 &3

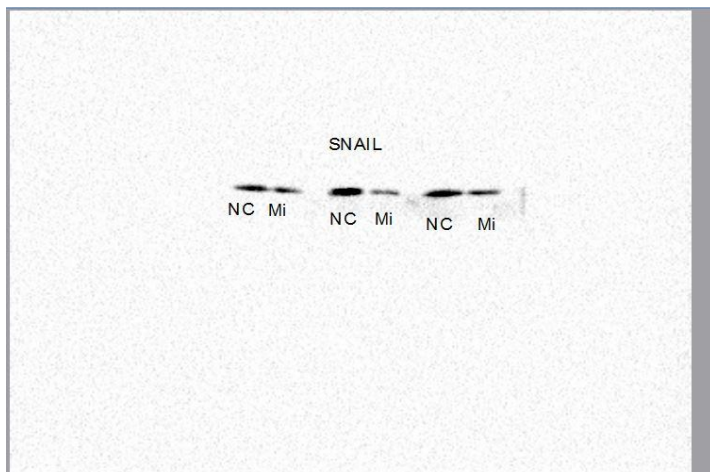

Exp.1,2 & 3 Expression of SNAIL in miR-4521 mimics transfected HEPG2

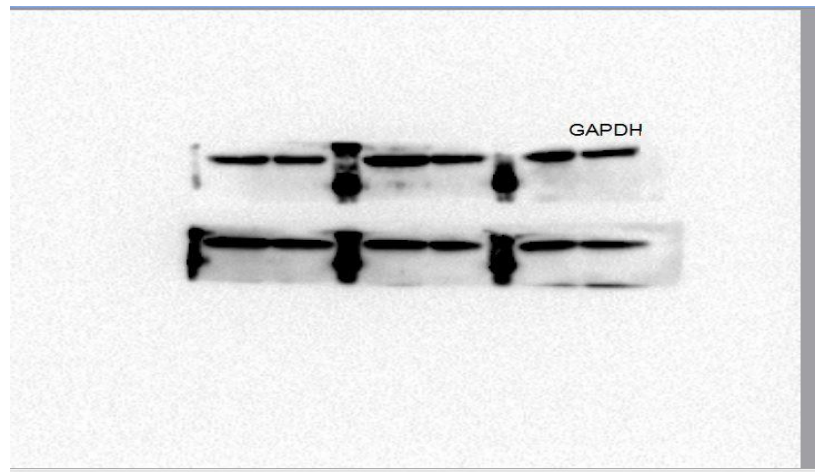

GAPDH for Exp.1,2& 3

# Experiment N0.1,2 &3

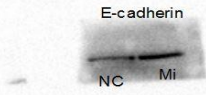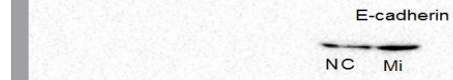

*Exp.1,2 Expression of E-cadherin in miR-4521 mimics transfected HEPG2*

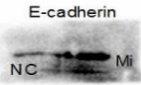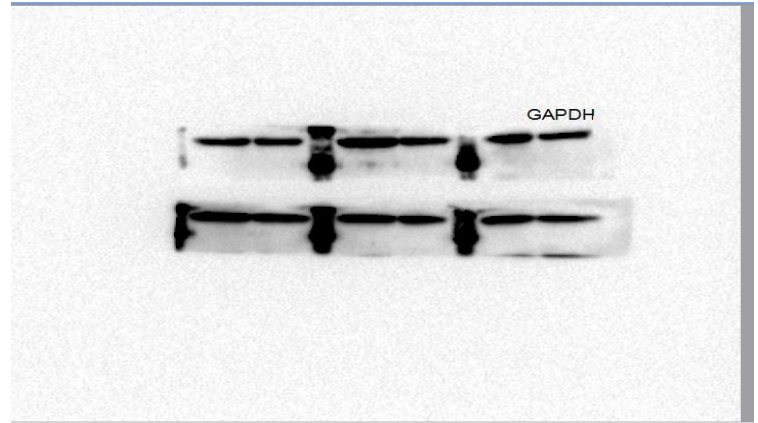

*GAPDH for Exp.1,2& 3*

*Exp.3 Expression of E-cadherin in miR-4521 mimics transfected HEPG2*

Experiment N0.1,2 &3

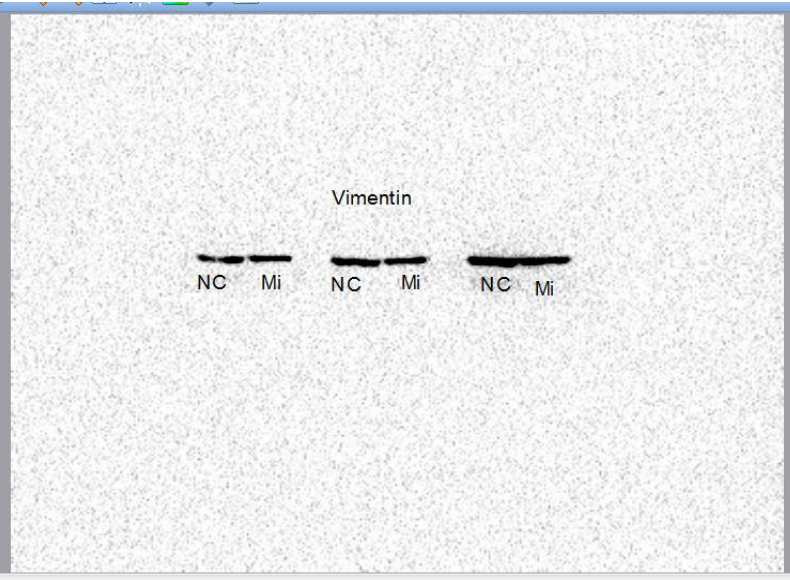

Exp.1,2 & 3 Expression of Vimentin in miR-4521 mimics transfected HEPG2

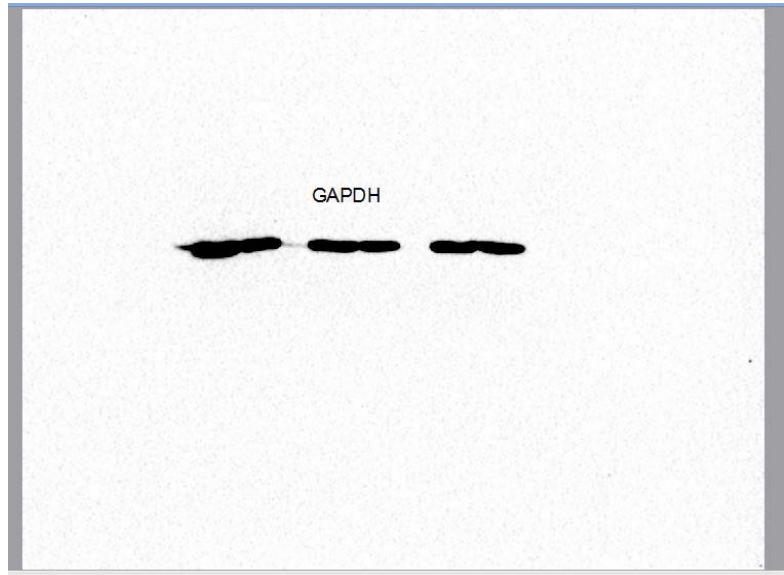

GAPDH for Exp.1,2& 3

Experiment N0.1, 2 &3

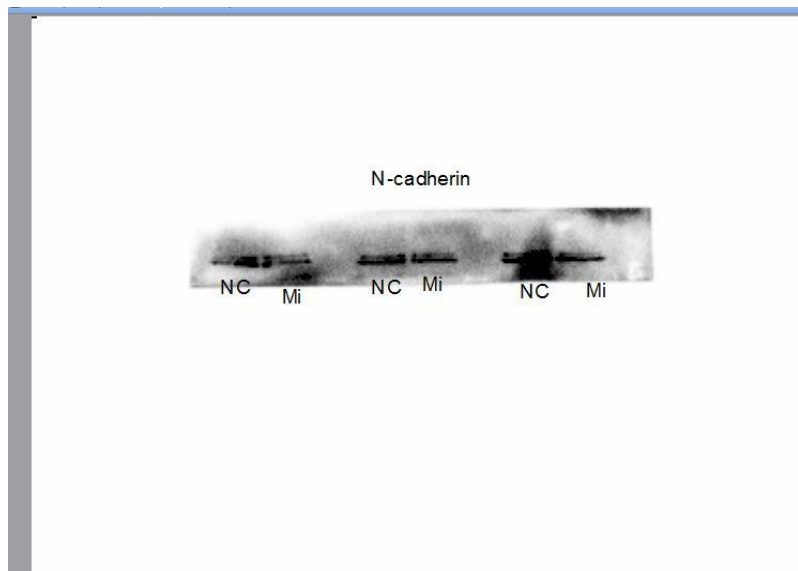

Exp.1,2 & 3 Expression of N-cadherin in miR-4521 mimics transfected HEPG2

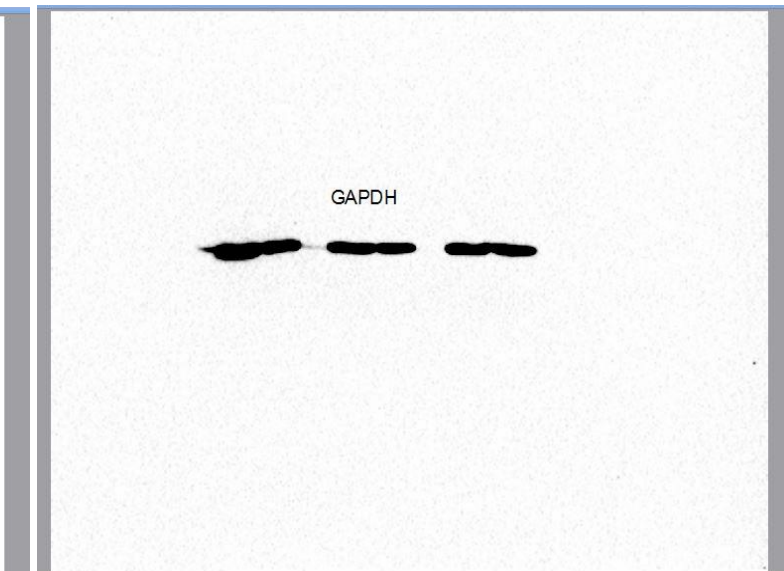

GAPDH for Exp.1,2& 3



C.

HCCLM3

Experiment N0.1,2 &3

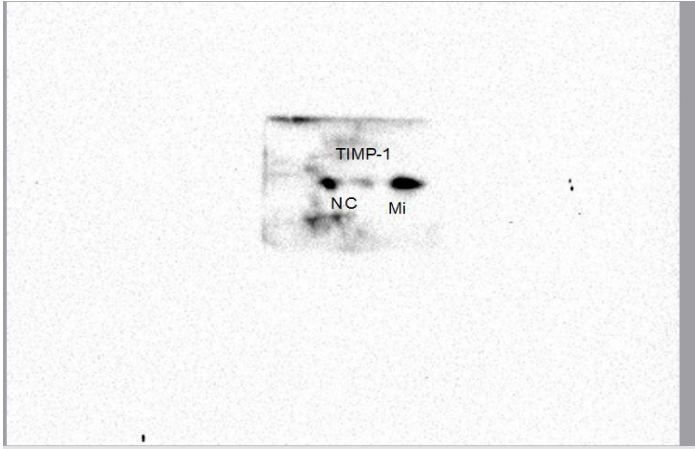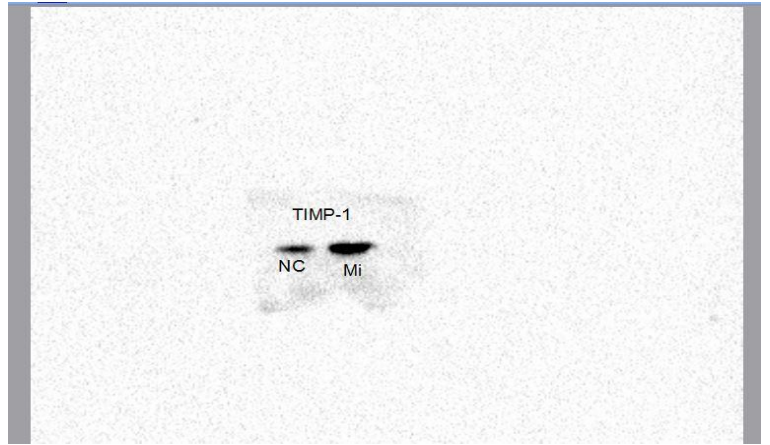

*Exp.1,2 Expression of TIMP-1 in miR-4521 mimics transfected LM3*

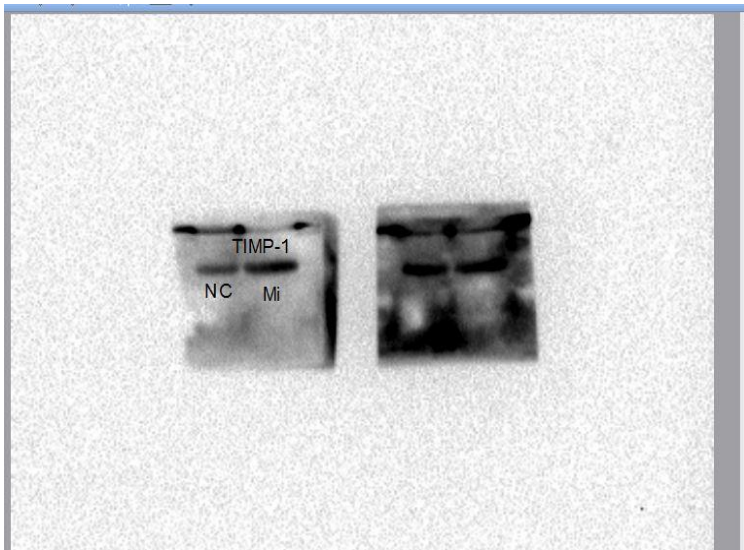

*Exp.3 Expression of TIMP-1 in miR-4521 mimics transfected LM3*

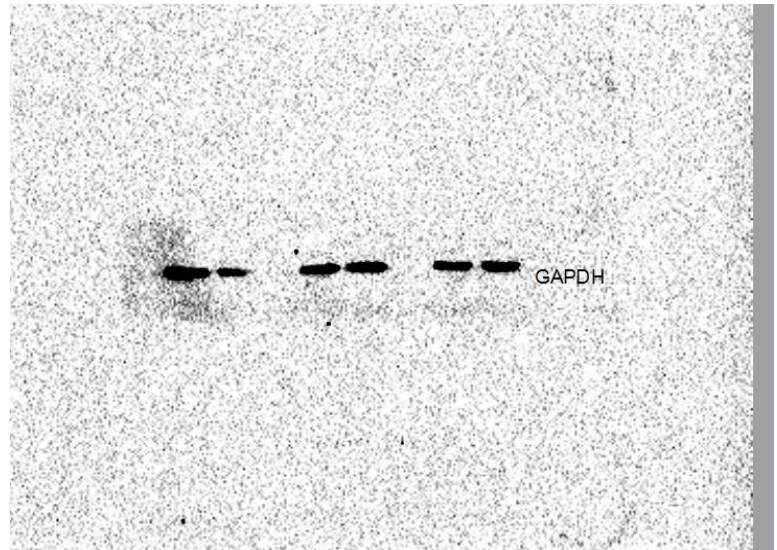

*GAPDH for Exp.1,2& 3*

### Experiment N0.1,2 &3

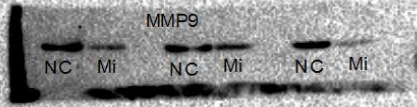

*Exp.1,2,3 Expression of MMP9 in miR-4521 mimics transfected LM3*

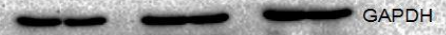

*GAPDH for Exp.1,2& 3*

### Experiment N0.1,2

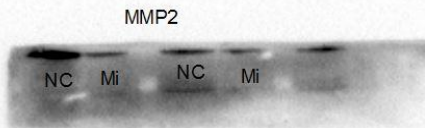

*Exp.1,2 Expression of MMP2 in miR-4521 mimics transfected LM3*

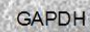

*GAPDH for Exp.1,2*



### Experiment N0. 3

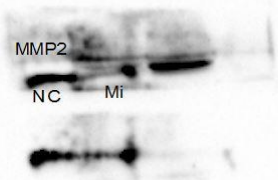

Exp.3 Expression of MMP2 in miR-4521 mimics transfected LM3

Western blot analysis of GAPDH expression in LM3 cells. The image shows two lanes: NC (negative control) and Mi (miR-4521 mimics). The GAPDH protein levels are consistent across both lanes, serving as a loading control.

GAPDH for Exp.3

### HepG2

#### Experiment N0.1,2 &3

Western blot analysis of TIMP-1 expression in HEPG2 cells. The image shows two lanes: NC (negative control) and Mi (miR-4521 mimics). The TIMP-1 protein levels are significantly higher in the Mi lane compared to the NC lane.

Exp.1,2 Expression of TIMP-1 in miR-4521 mimics transfected HEPG2

Western blot analysis of TIMP-1 expression in HEPG2 cells. The image shows two lanes: NC (negative control) and Mi (miR-4521 mimics). The TIMP-1 protein levels are significantly higher in the Mi lane compared to the NC lane.



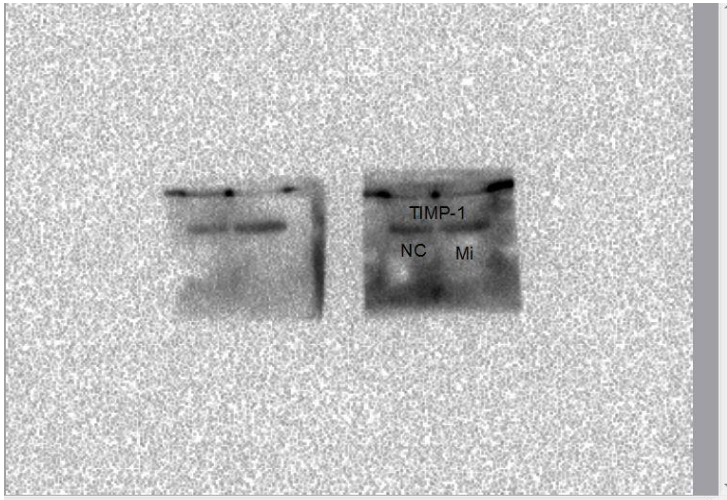

Exp.3 Expression of TIMP-1 in miR-4521 mimics transfected HEPG2

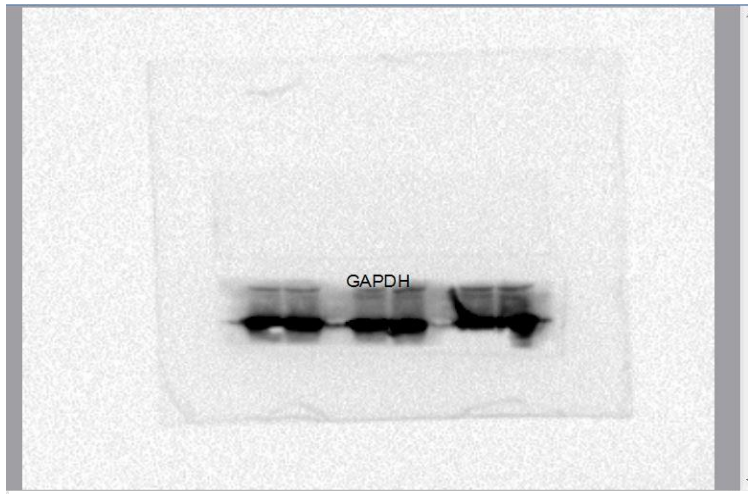

GAPDH for Exp.1,2& 3

Experiment N0.1,2 &3

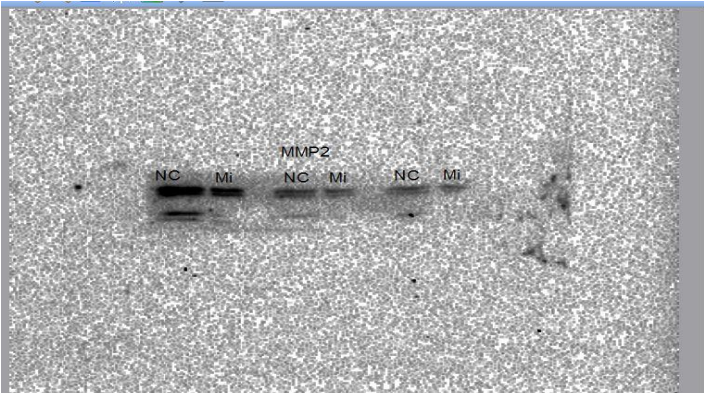

Exp.1,2,3 Expression of MMP2 in miR-4521 mimics transfected HEPG2

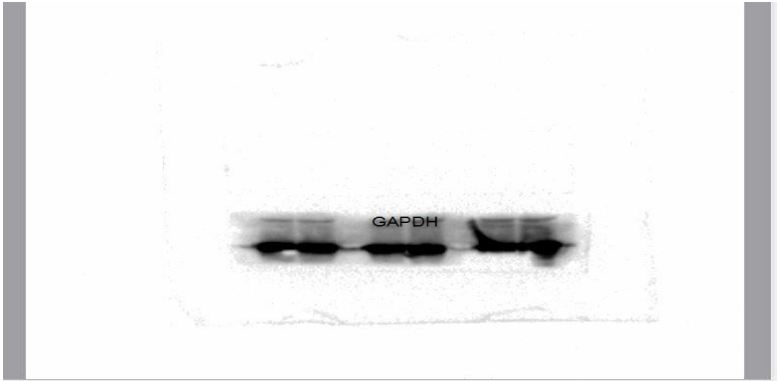

GAPDH for Exp.1,2& 3

Experiment N0.1,2

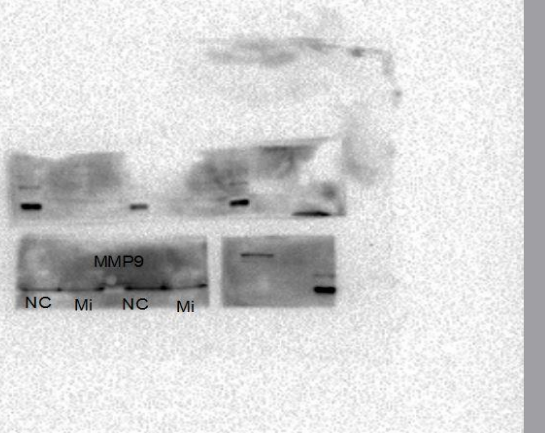

*Exp.1,2 Expression of MMP9 in miR-4521 mimics transfected HEPG2*

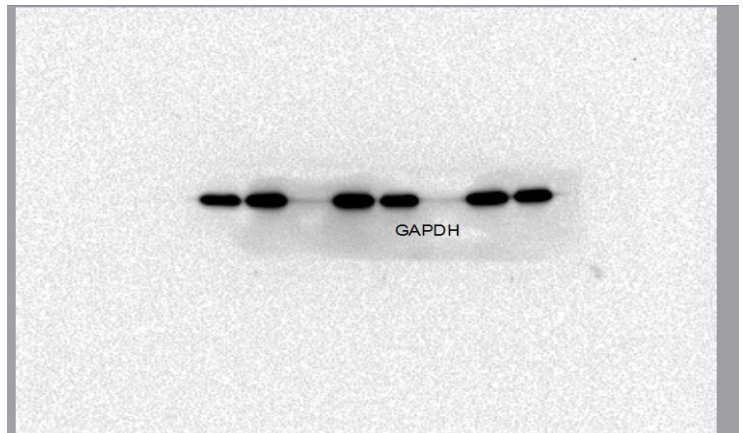

*GAPDH for Exp.1,2*

Experiment N0.3

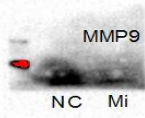

*Exp.3 Expression of MMP9 in miR-4521 mimics transfected HEPG2*

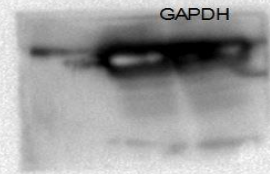

*GAPDH for Exp.3*

D.

HCCLM3



### Experiment N0.1,2

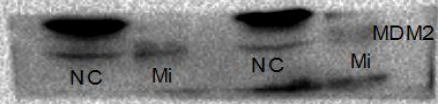

*Exp.1,2 Expression of MDM2 in miR-4521 mimics transfected LM3*

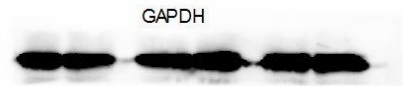

*GAPDH for Exp.1,2*

### Experiment N0.3

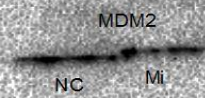

*Exp.3 Expression of MDM2 in miR-4521 mimics transfected LM3*

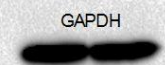

*GAPDH for Exp.3*



Experiment N0.1,2

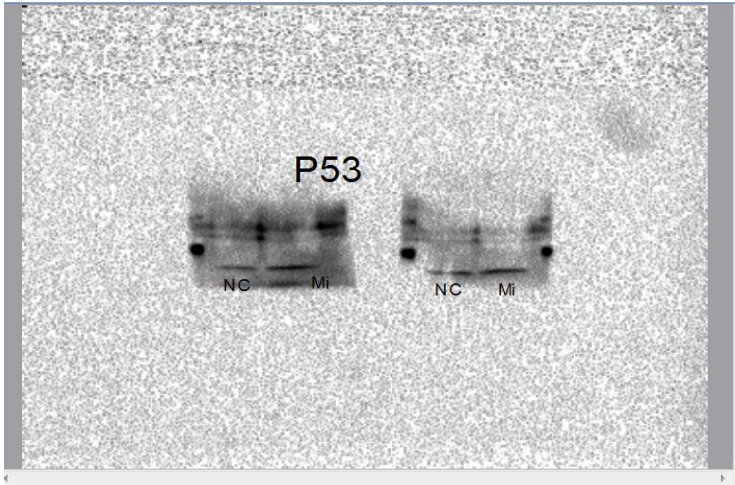

*Exp.1,2 Expression of P53 in miR-4521 mimics transfected LM3*

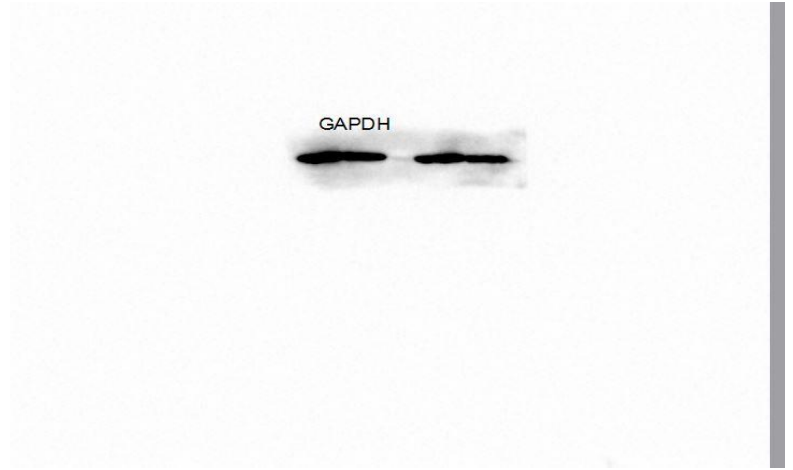

*GAPDH for Exp.1,2*

Experiment N0.3

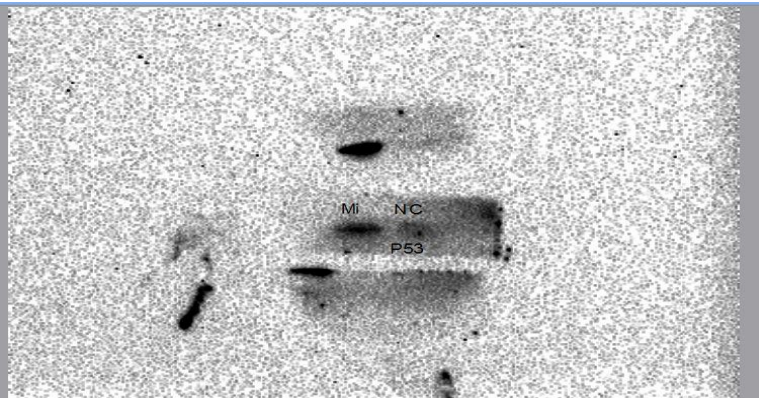

*Exp.3 Expression of P53 in miR-4521 mimics transfected LM3*

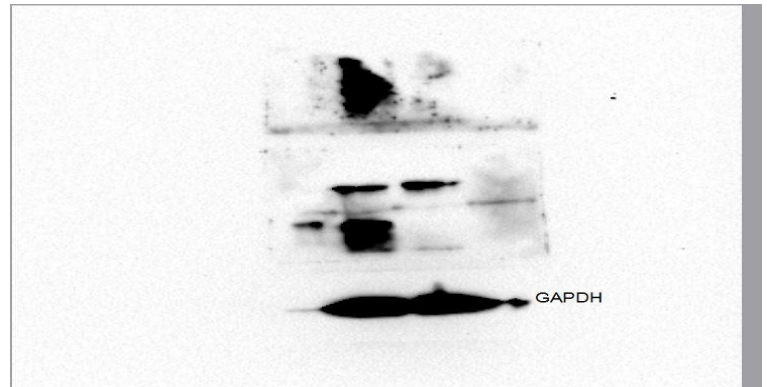

*GAPDH for Exp.3*

## Experiment N0.1

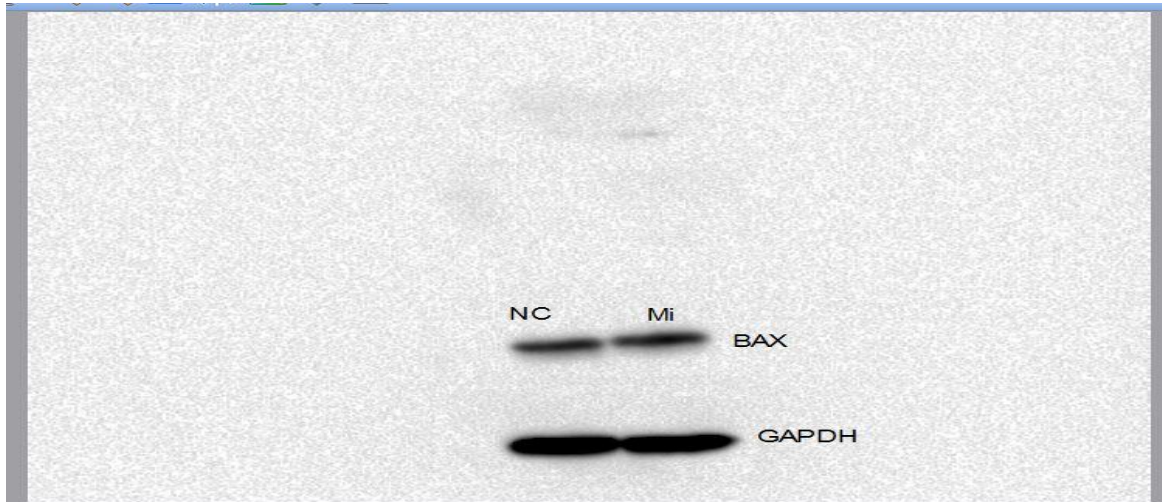

*Exp.1 Expression of BAX in miR-4521 mimics transfected LM3 with GAPDH*

## Experiment N0.2

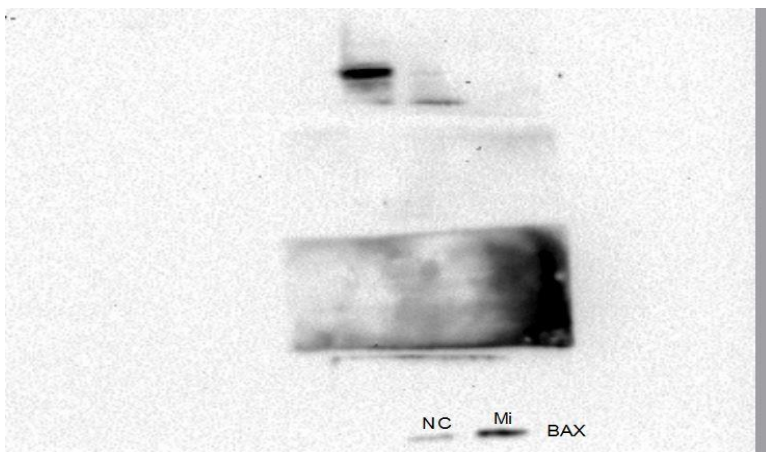

*Exp.2 Expression of BAX in miR-4521 mimics transfected LM3*

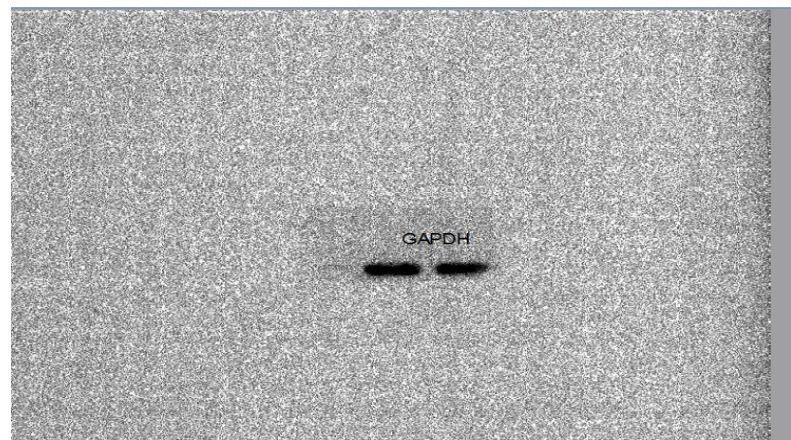

*GAPDH for Exp.2*



### Experiment N0.3

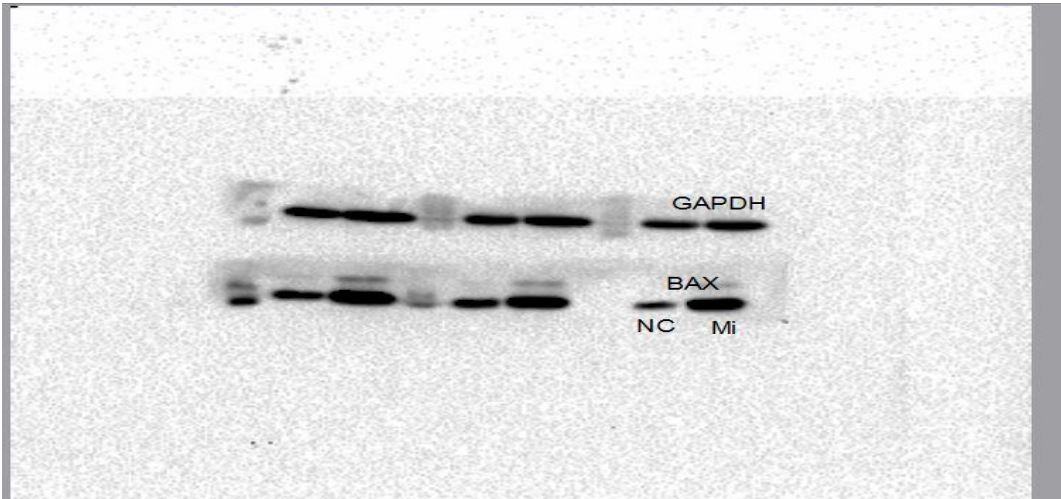

*Exp.3 Expression of BAX in miR-4521 mimics transfected LM3 with GAPDH*

### Experiment N0.1

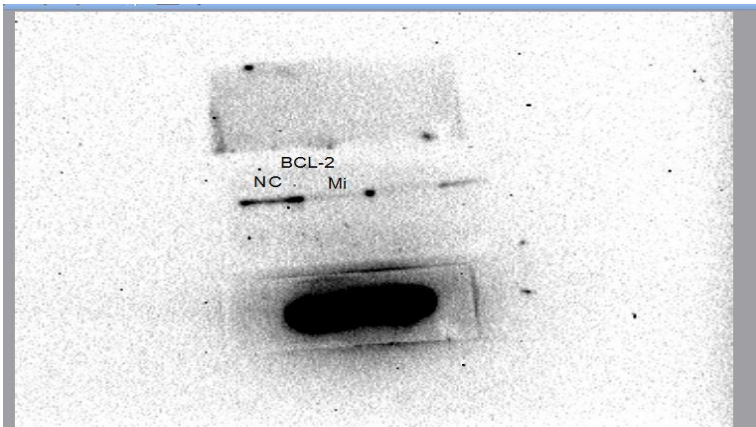

*Exp.1 Expression of BCL-2 in miR-4521 mimics transfected LM3*

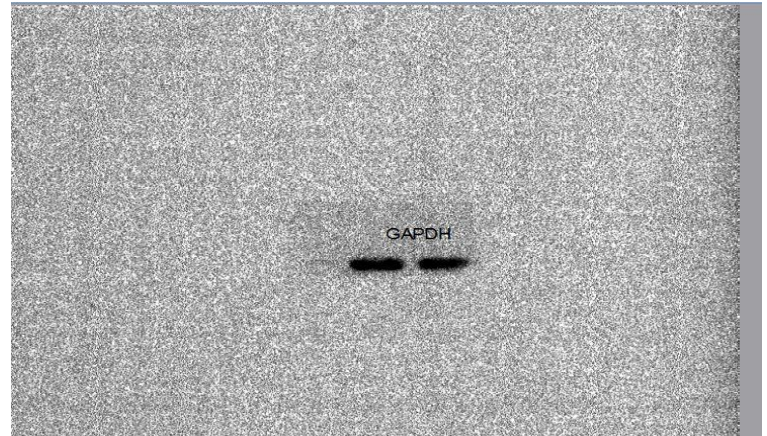

*GAPDH for Exp.1*



## Experiment N0.2 & 3

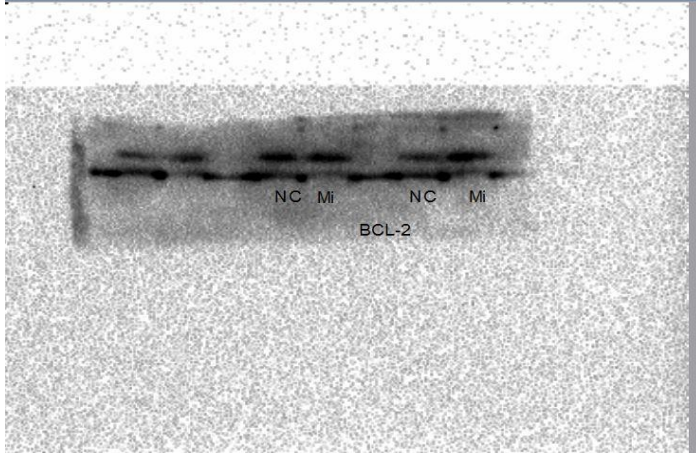

*Exp. 2, 3 Expression of BCL-2 in miR-4521 mimics transfected LM3*

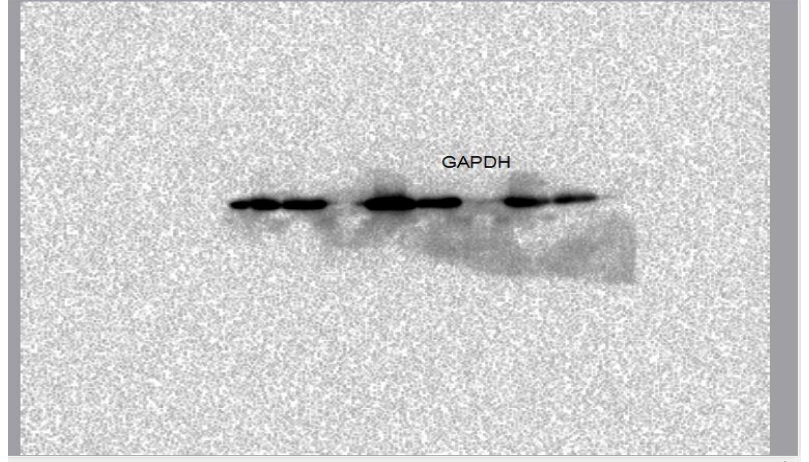

*GAPDH for Exp.2,3*

## HepG2

### Experiment N0.1

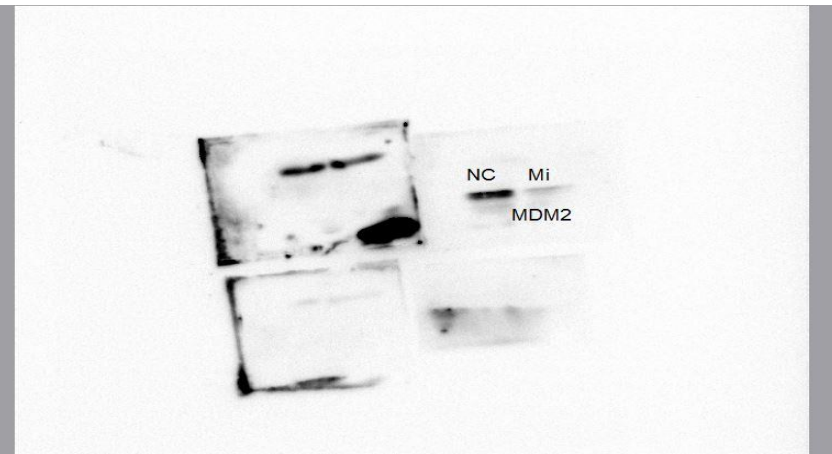

*Exp.1 Expression of MDM2 in miR-4521 mimics transfected HEPG2*

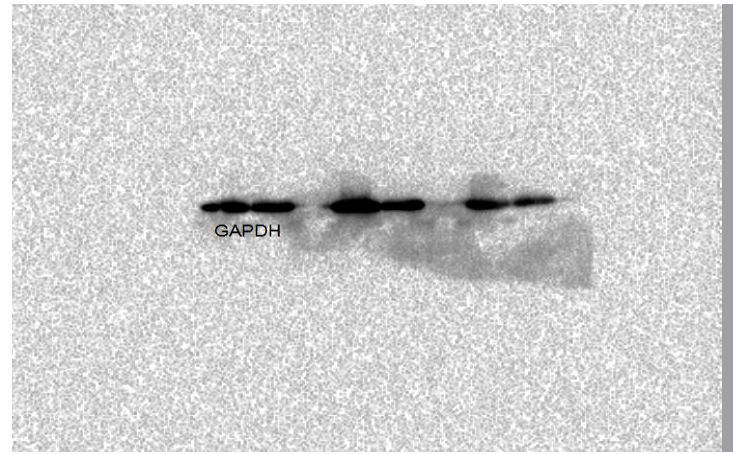

*GAPDH for Exp.1*

## Experiment N0.2 & 3

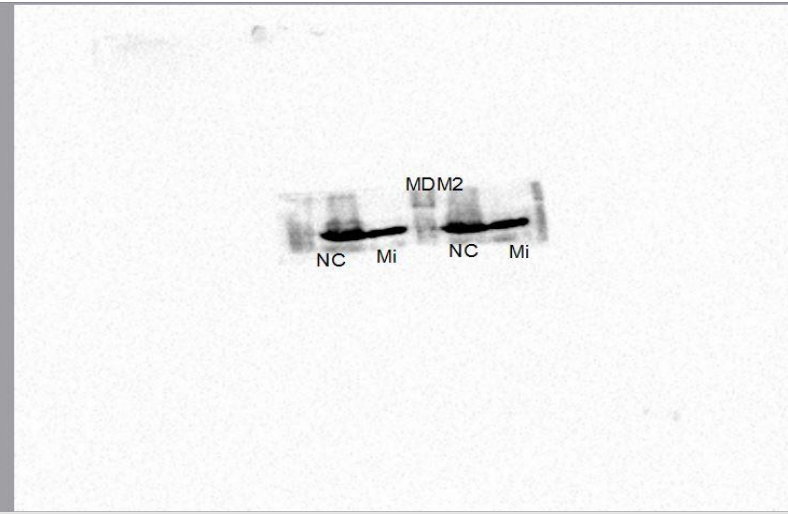

*Exp.2,3 Expression of MDM2 in miR-4521 mimics transfected HEPG2*

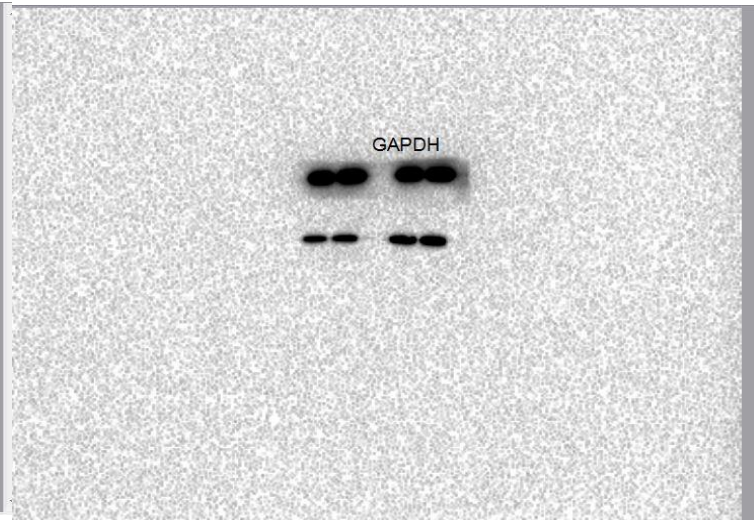

*GAPDH for Exp.2,3*

## Experiment N0.1

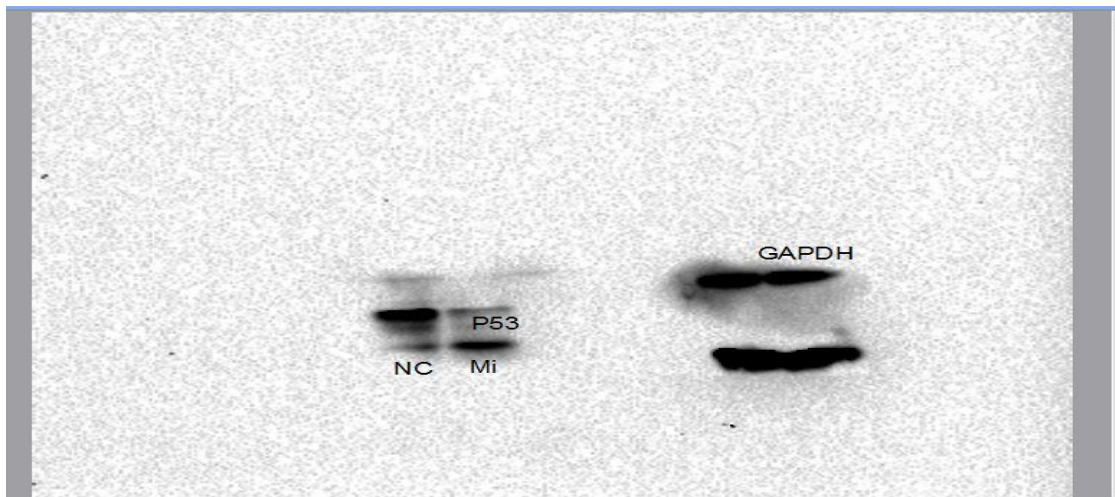

*Exp.1 Expression of P53 in miR-4521 mimics transfected HEPG2 with GAPDH*



## Experiment N0.2

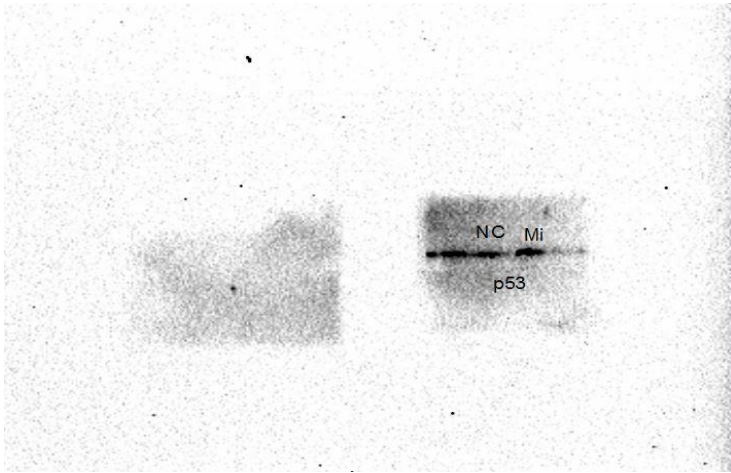

Exp.2 Expression of P53 in miR-4521 mimics transfected HEPG2

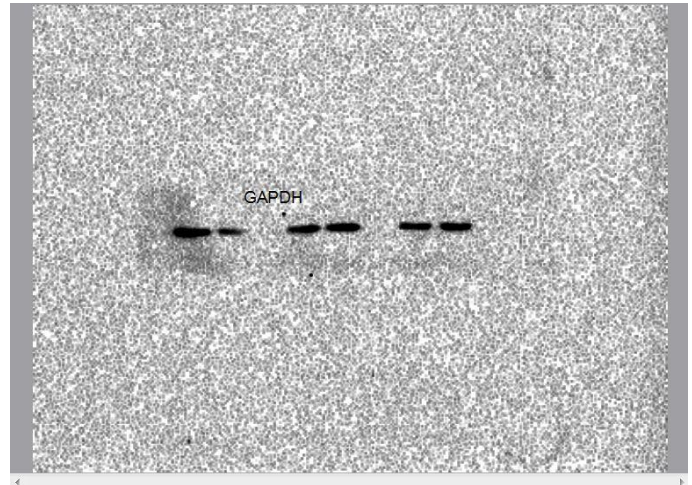

GAPDH for Exp.2

## Experiment N0. 3

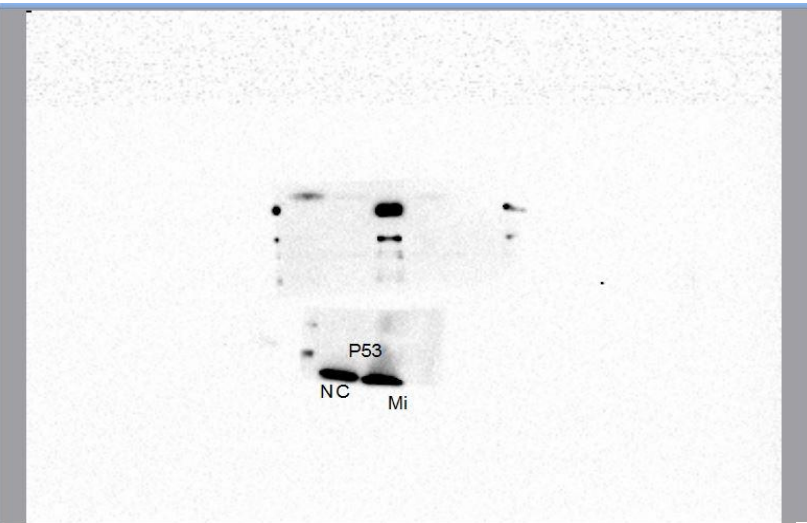

Exp.3 Expression of P53 in miR-4521 mimics transfected HEPG2

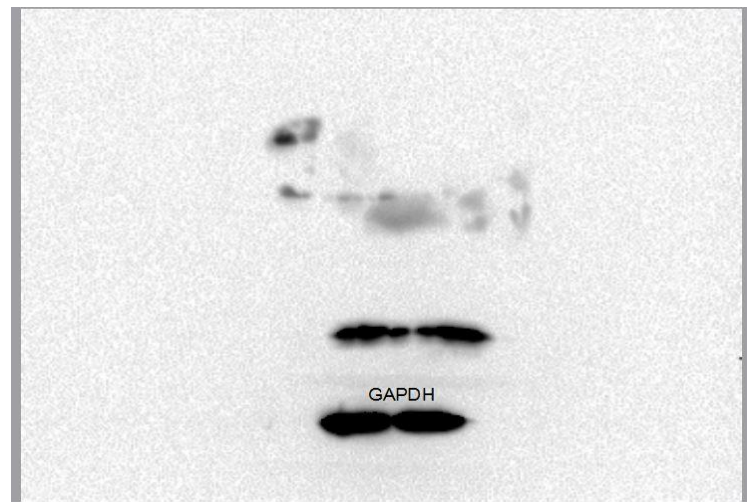

GAPDH for Exp.3



## Experiment N0.1

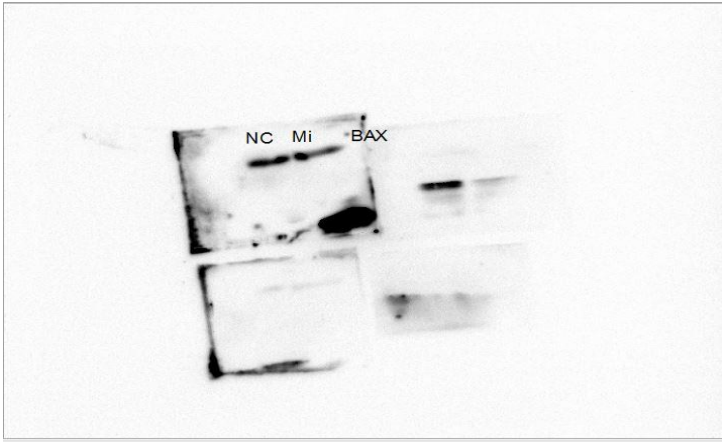

*Exp.1 Expression of BAX in miR-4521 mimics transfected HEPG2*

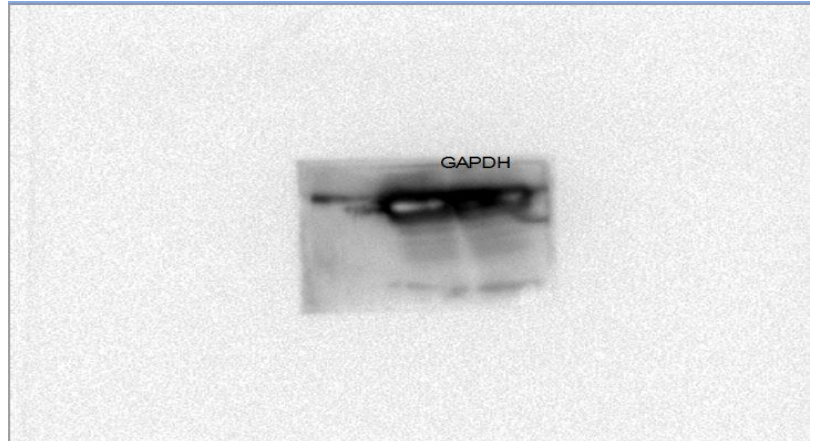

*GAPDH for Exp.1*

## Experiment N0.2

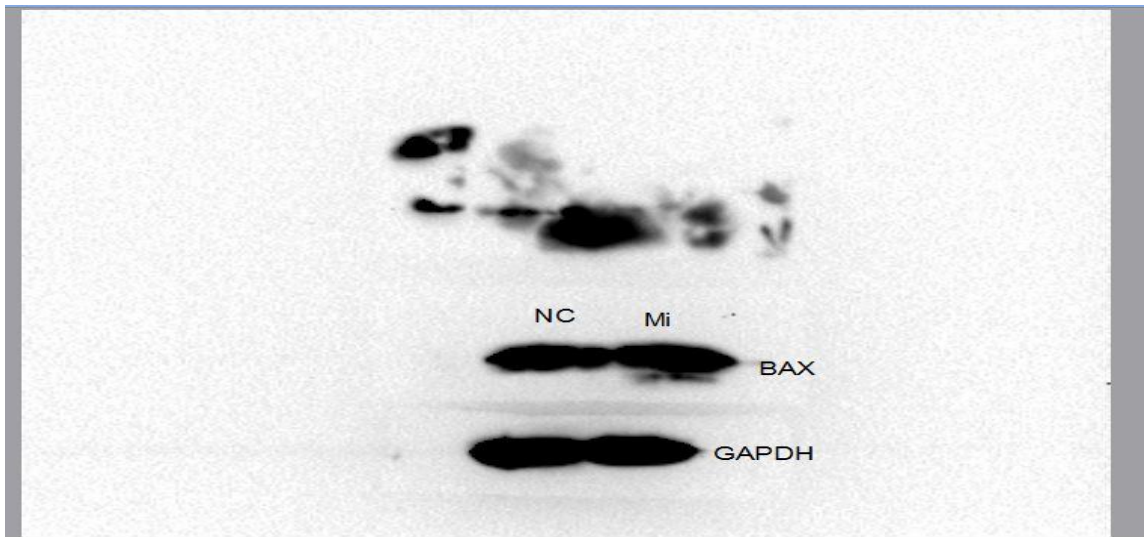

*Exp.2 Expression of BAX in miR-4521 mimics transfected HEPG2 with GAPDH*

### Experiment N0.3

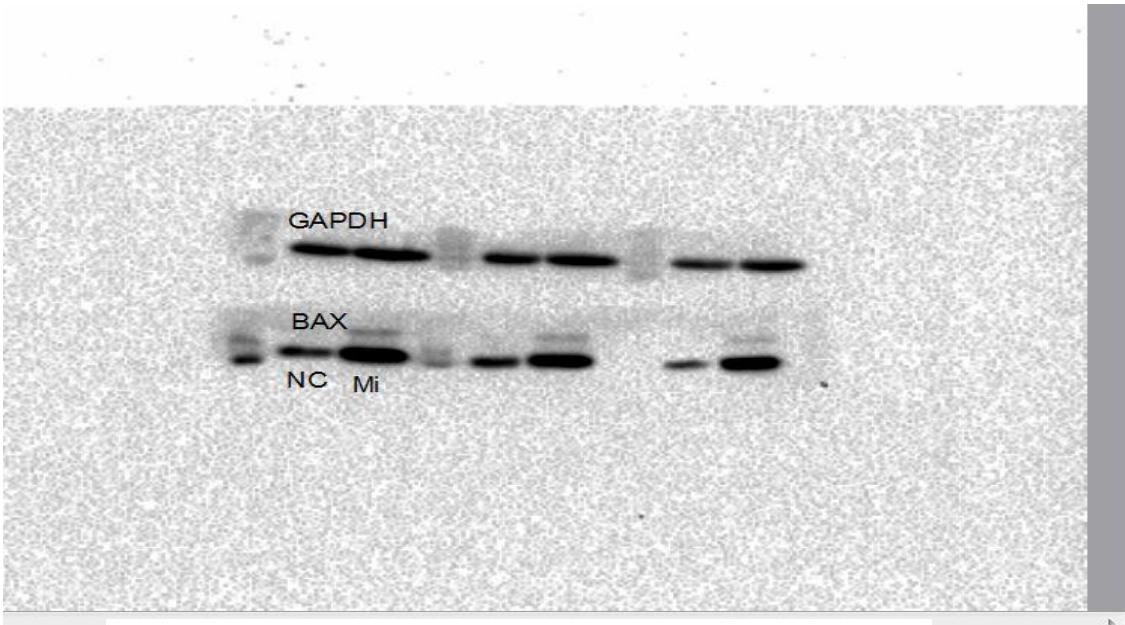

*Exp.3 Expression of BAX in miR-4521 mimics transfected HEPG2 with GAPDH*

### Experiment N0.1

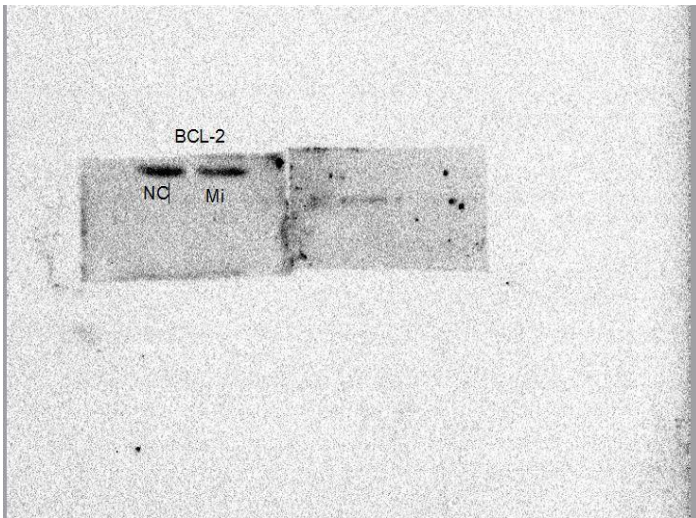

*Exp.1 Expression of BCL-2 in miR-4521 mimics transfected HEPG2*

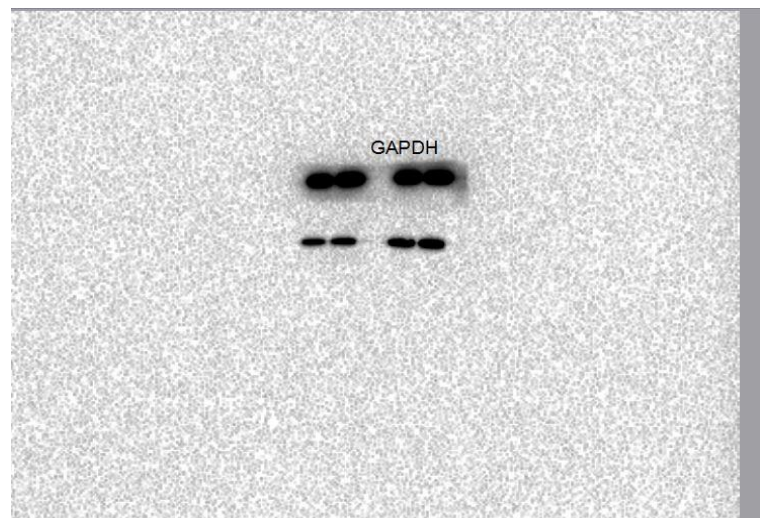

*GAPDH for Exp.1*



### Experiment N0.2

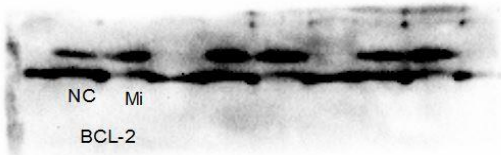

*Exp.2 Expression of BCL-2 in miR-4521 mimics transfected HEPG2*

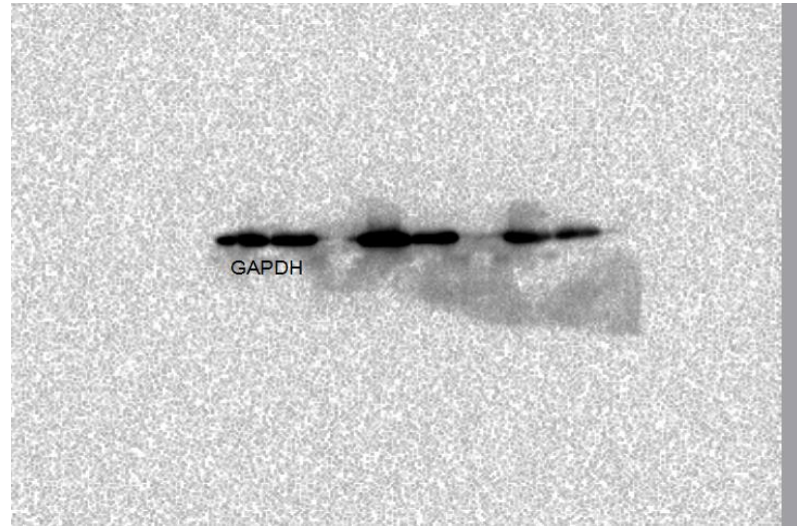

*GAPDH for Exp.2*

### Experiment N0.3

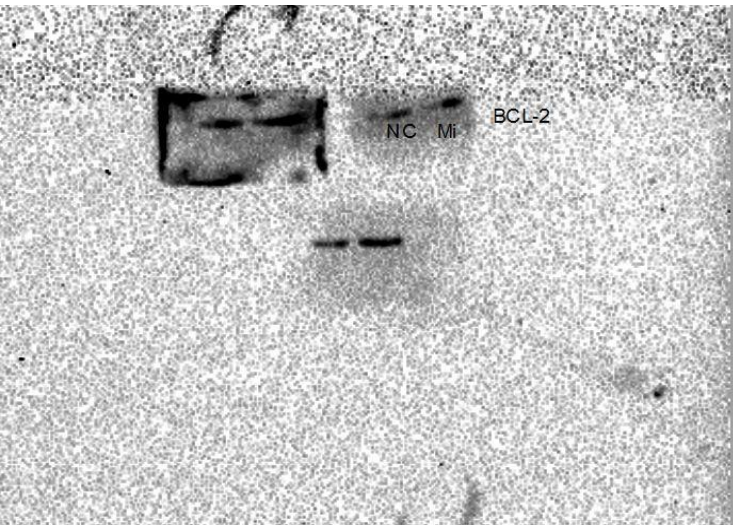

*Exp.3 Expression of BCL-2 in miR-4521 mimics transfected HEPG2*

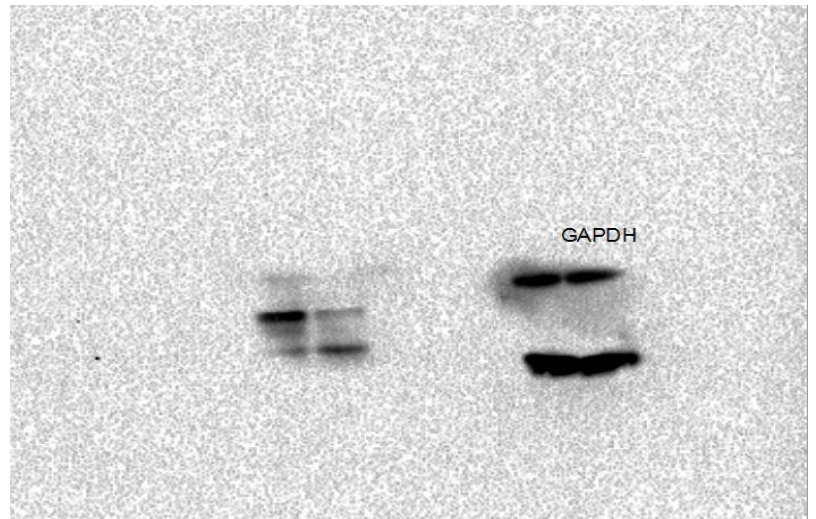

*GAPDH for Exp.3*

E.

HCCLM3

Experiment N0.1

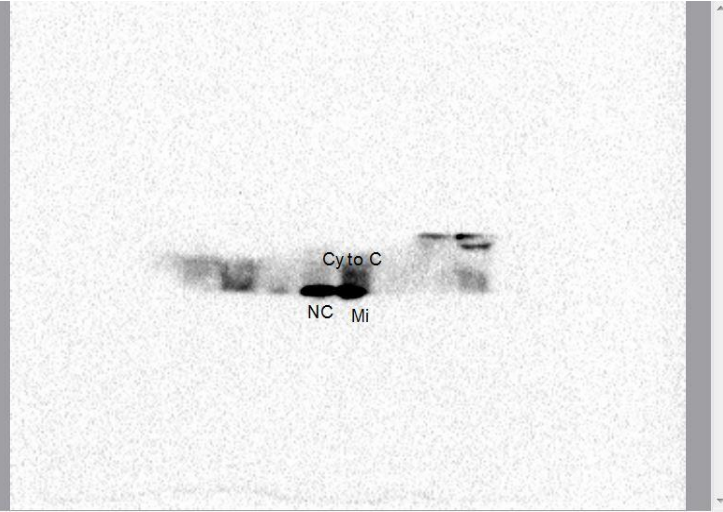

Exp. 1 Expression of Cytochrome-C in miR-4521 mimics transfected LM3

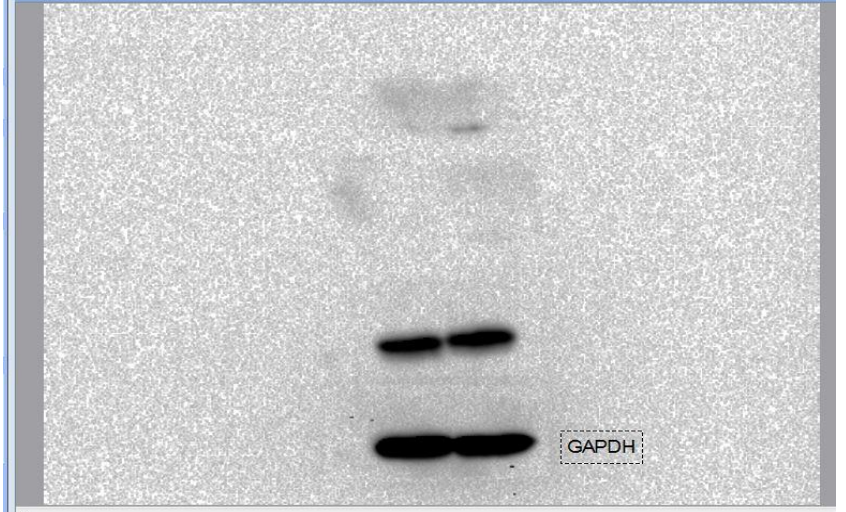

GAPDH for Exp.1

Experiment No.2

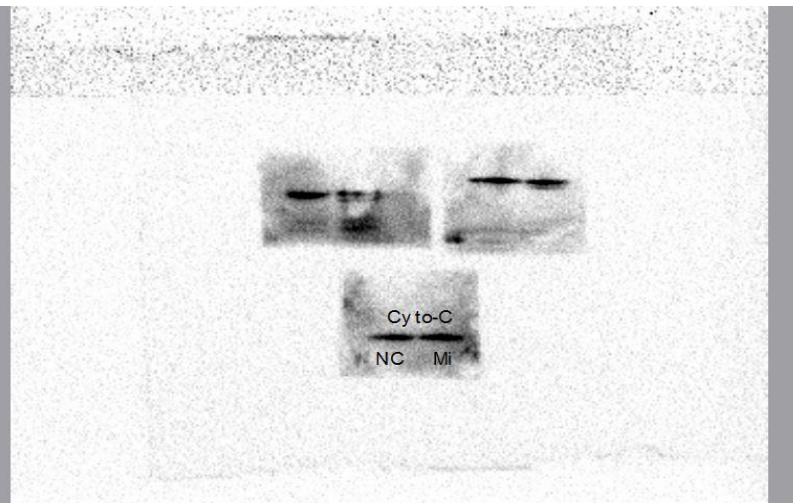

Exp. 2 Expression of Cytochrome-C in miR-4521 mimics transfected LM3

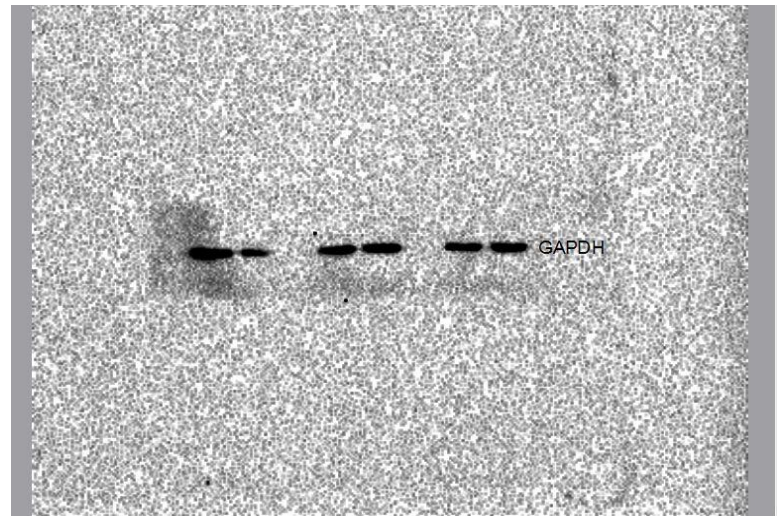

GAPDH for Exp.2



### Experiment No.3

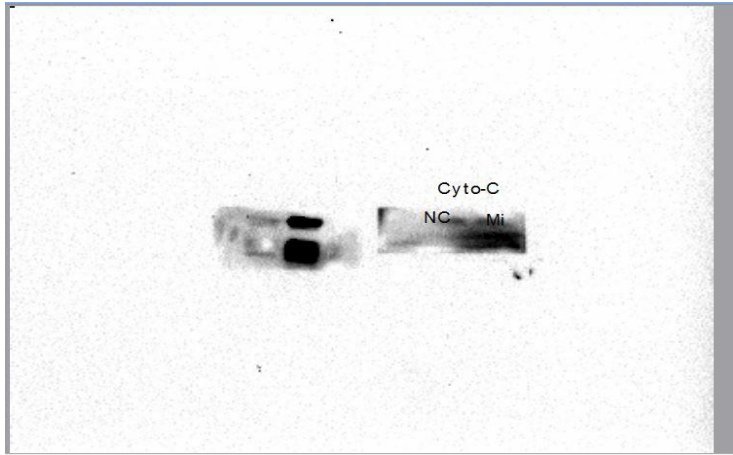

*Exp. 3 Expression of Cytochrome-C in miR-4521 mimics transfected LM3*

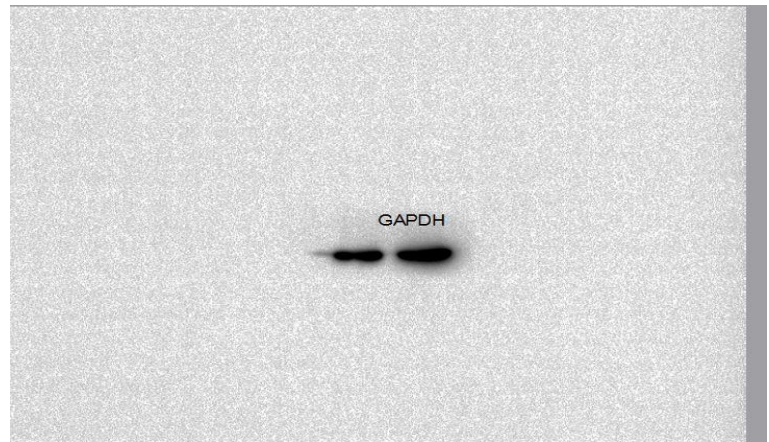

*GAPDH for Exp.3*

### Experiment No.1, 2 &3

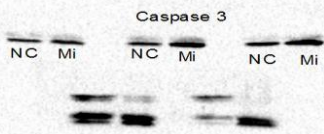

*Exp.1,2 & 3 Expression of Caspase-3 in miR-4521 mimics transfected LM3*

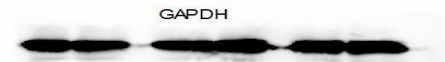

*GAPDH for Exp.1,2 & 3*

## Experiment No.1

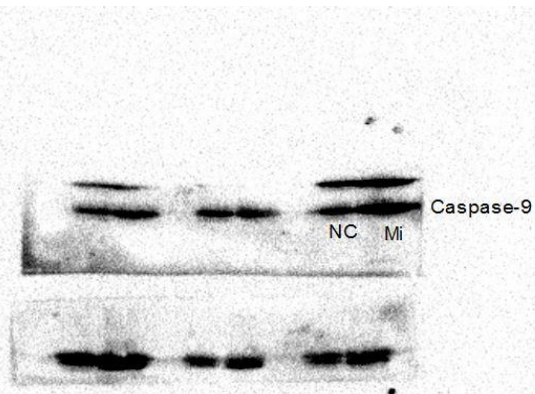

*Exp.1 Expression of Caspase-9 in miR-4521 mimics transfected LM3*

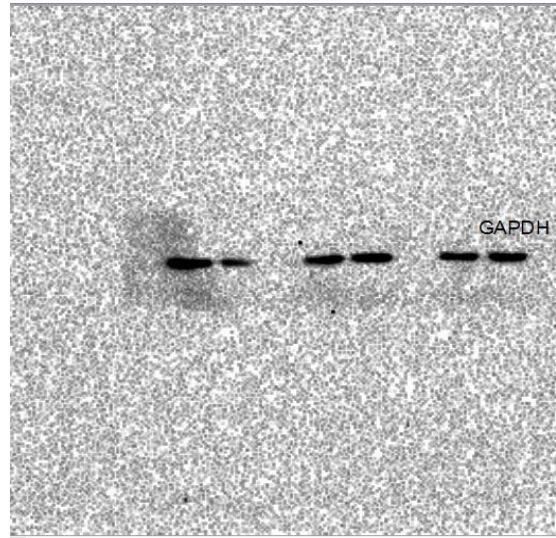

*GAPDH for Exp.1*

## Experiment No.2

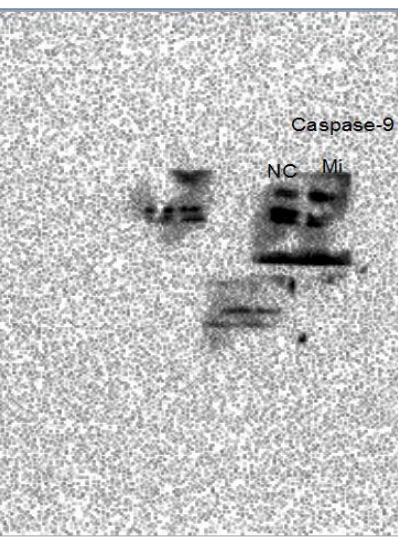

*Exp.2 Expression of Caspase-9 in miR-4521 mimics transfected LM3*

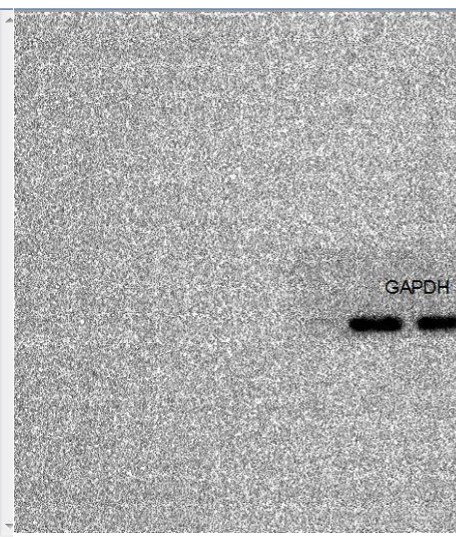

*GAPDH for Exp.2*



### Experiment No.3

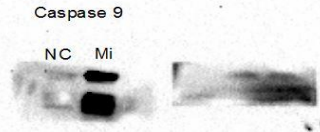

*Exp.3 Expression of Caspase-9 in miR-4521 mimics transfected LM3*

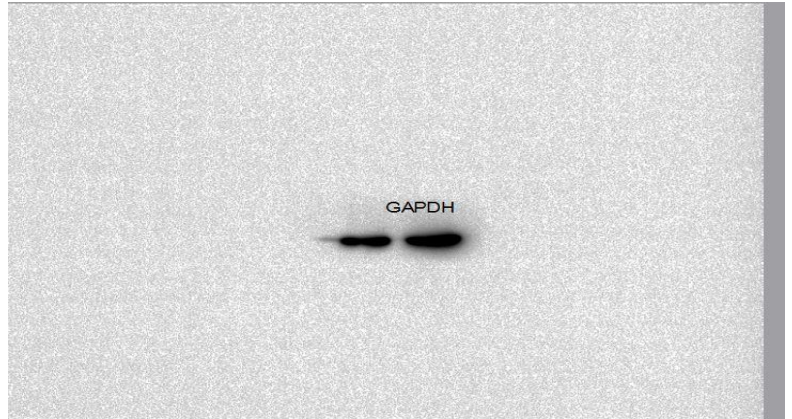

*GAPDH for Exp.3*

### HepG2

### Experiment N0.1

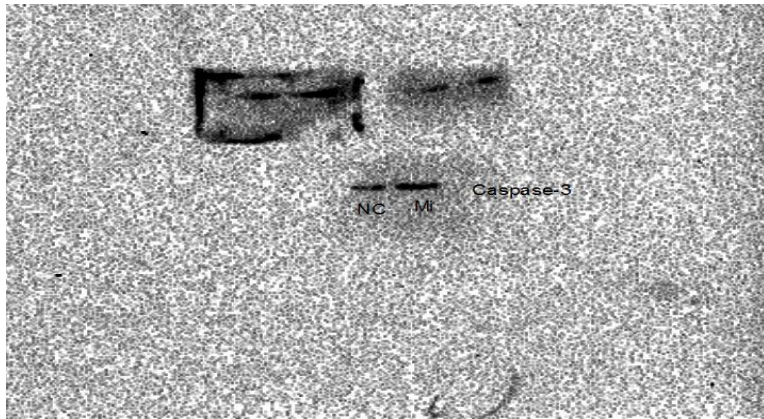

*Exp.1 Expression of Caspase-3 in miR-4521 mimics transfected HEPG2*

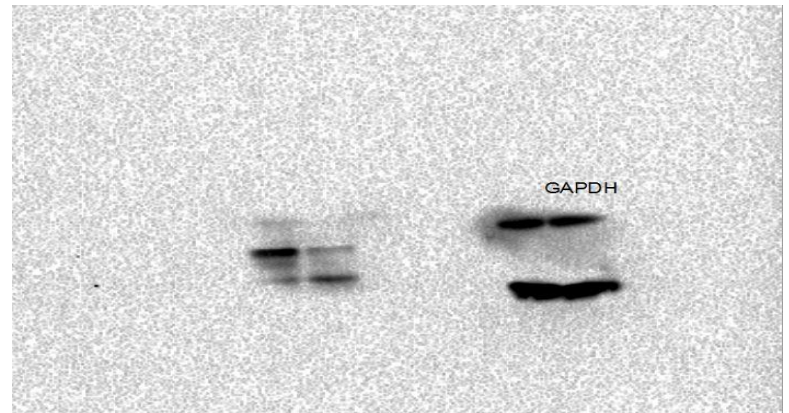

*GAPDH for Exp.1*

## Experiment No.2,3

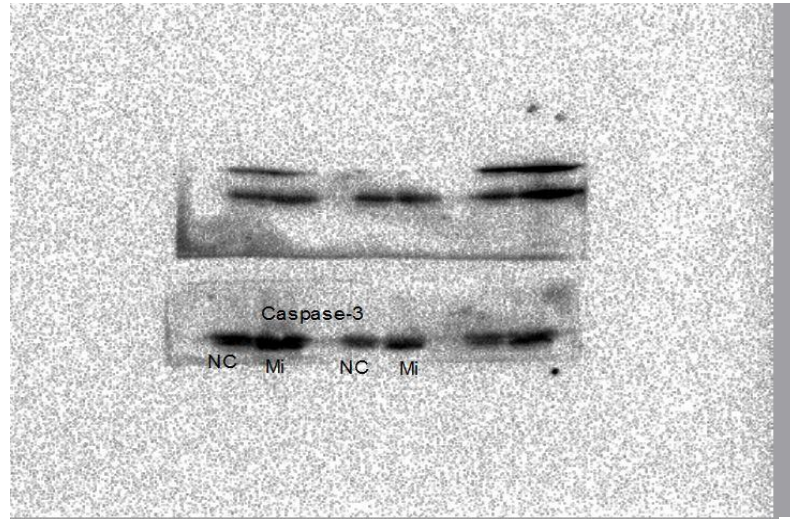

*Exp.2, 3 Expression of Caspase-3 in miR-4521 mimics transfected HEPG2*

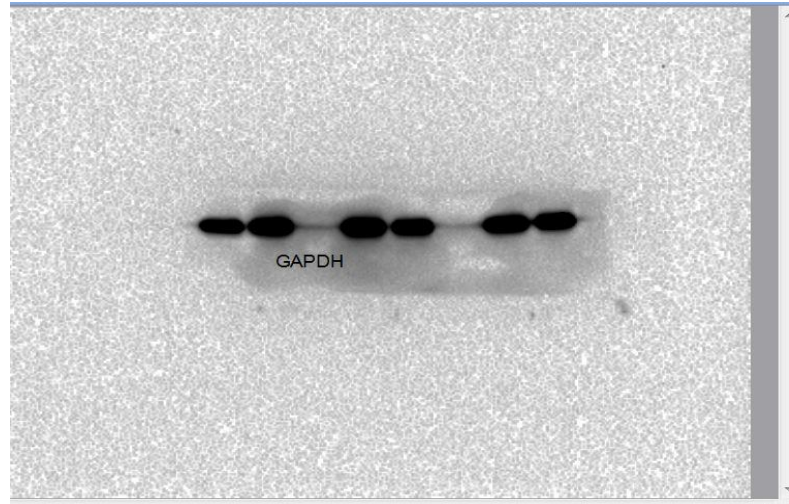

*GAPDH for Exp.2,3*

## Experiment N0.1

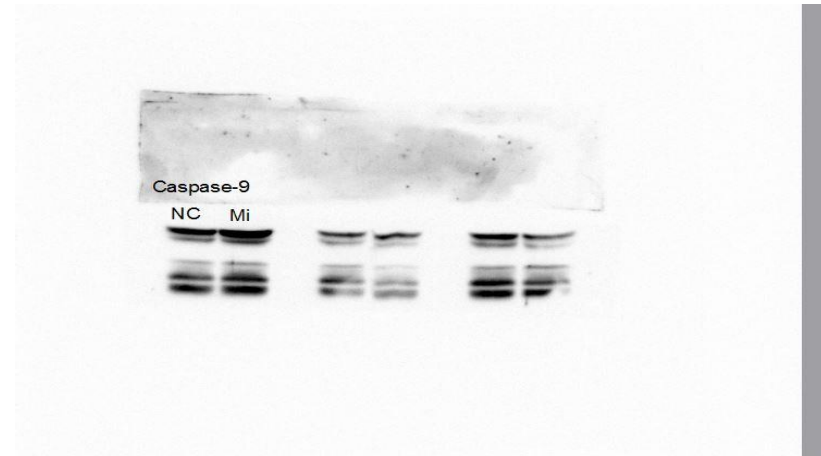

*Exp.1 Expression of Caspase-9 in miR-4521 mimics transfected HEPG2*

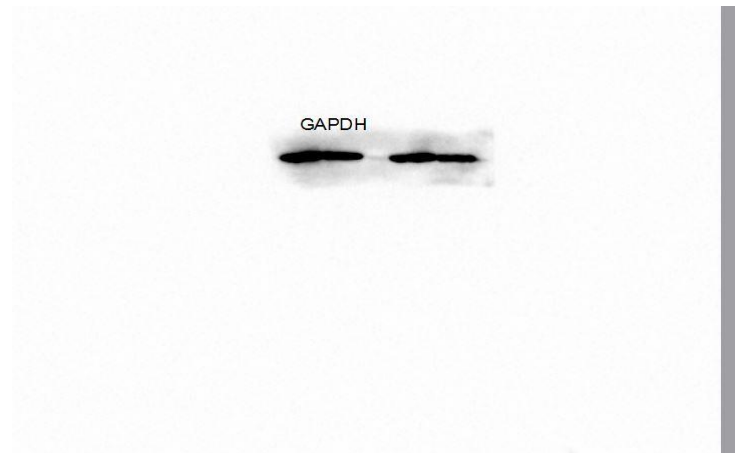

*GAPDH for Exp.1*



Experiment N0.2,3

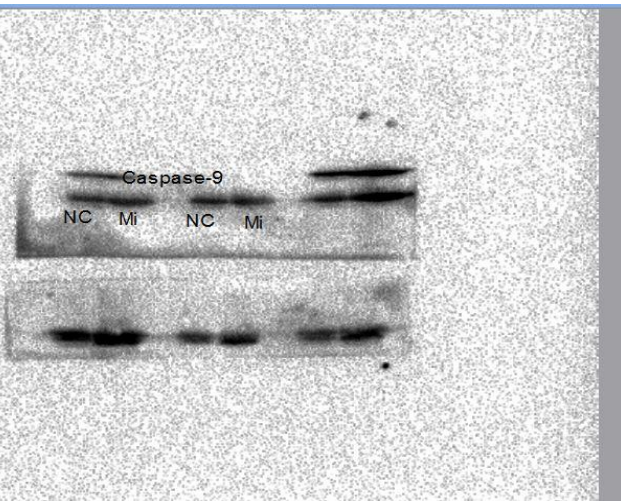

Exp.2, 3 Expression of Caspase-9 in miR-4521 mimics transfected HEPG2

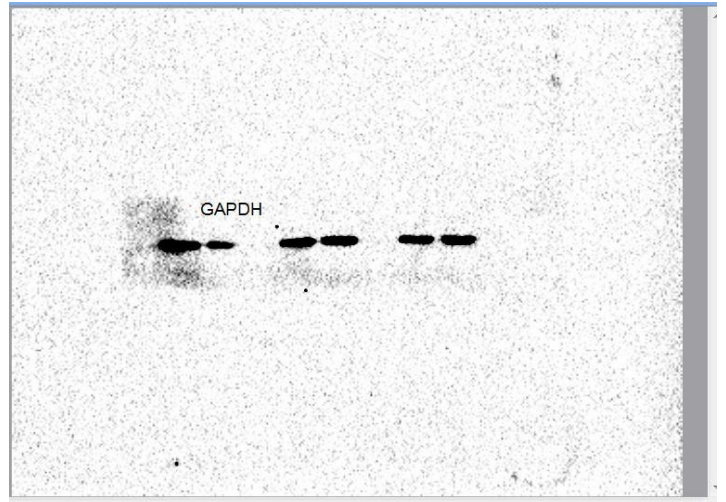

GAPDH for Exp.2,3

Experiment No.1,2,3

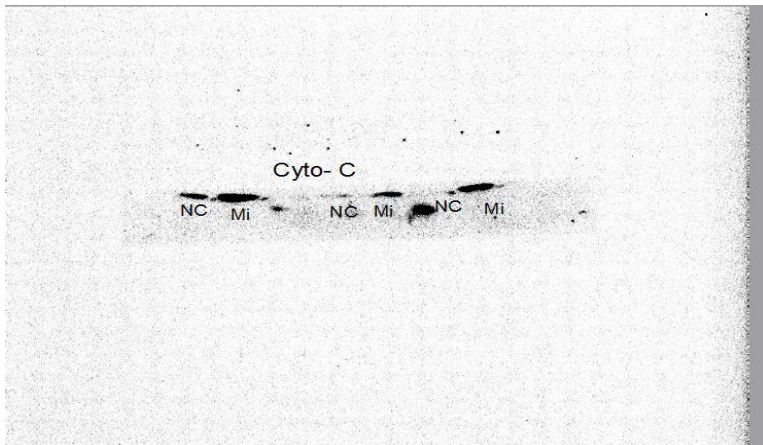

Exp.1, 2, 3 Expression of Cytochrome-C in miR-4521 mimics transfected HEPG2

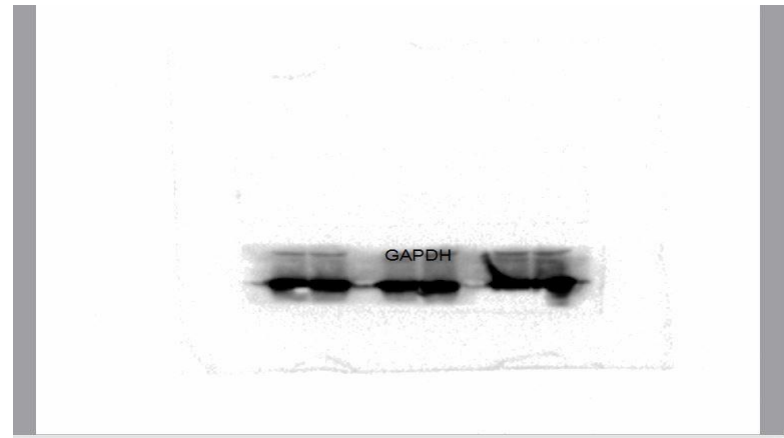

GAPDH for Exp.1,2,3

1.5 Figure 6 (A, B, C, D and E), original blots

Expression of signaling protein transfected with si-FAM129A in HCCLM3 and HepG2 cells.

A.

HCCLM3

Experiment No.1,2,3

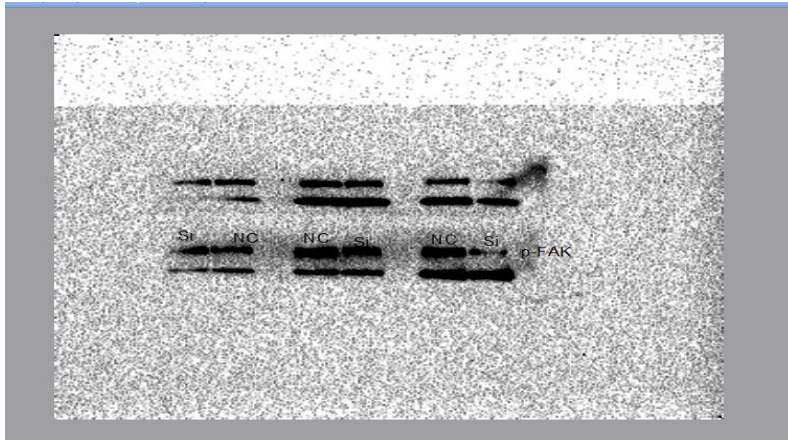

Exp.1, 2, 3 Expression of p-FAK in si-FAM129A transfected LM3

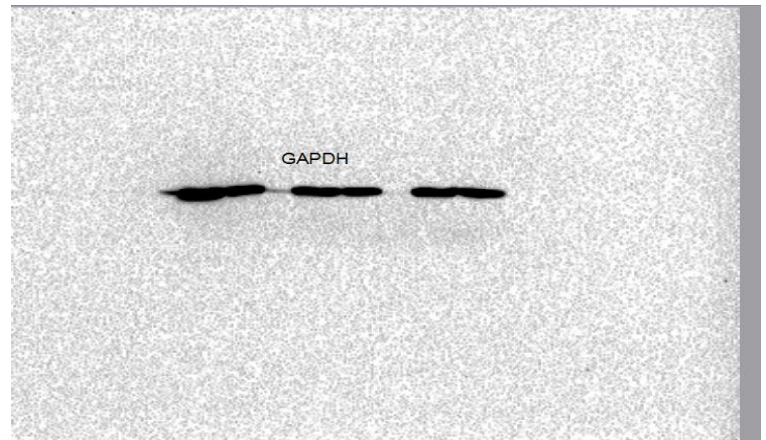

GAPDH for Exp.1,2,3

Experiment No.1,2 &3

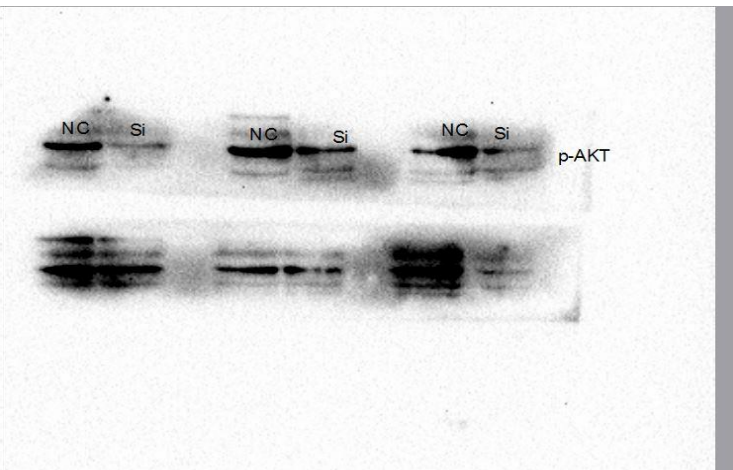

Exp.1, 2, 3 Expression of p-AKT in si-FAM129A transfected LM3

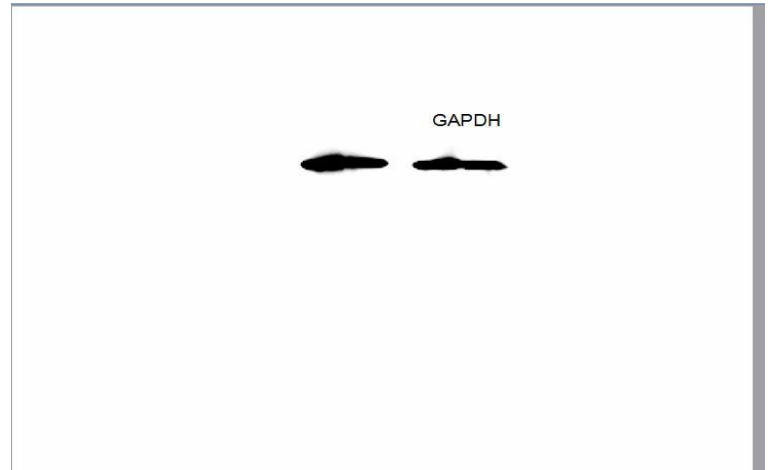

GAPDH for Exp.1,2

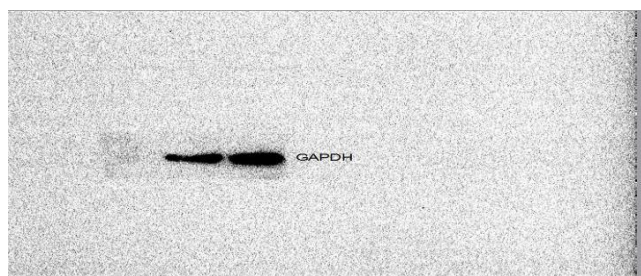

GAPDH for Exp.3



A.

HepG2

Experiment No.1,2,&3

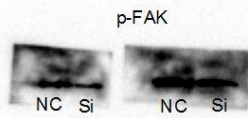

*Exp.1,2 Expression of p-FAK in si-FAM129A transfected HEPG2*

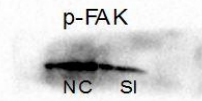

*Exp3 Expression of p-FAK in si-FAM129A transfected HEPG2*

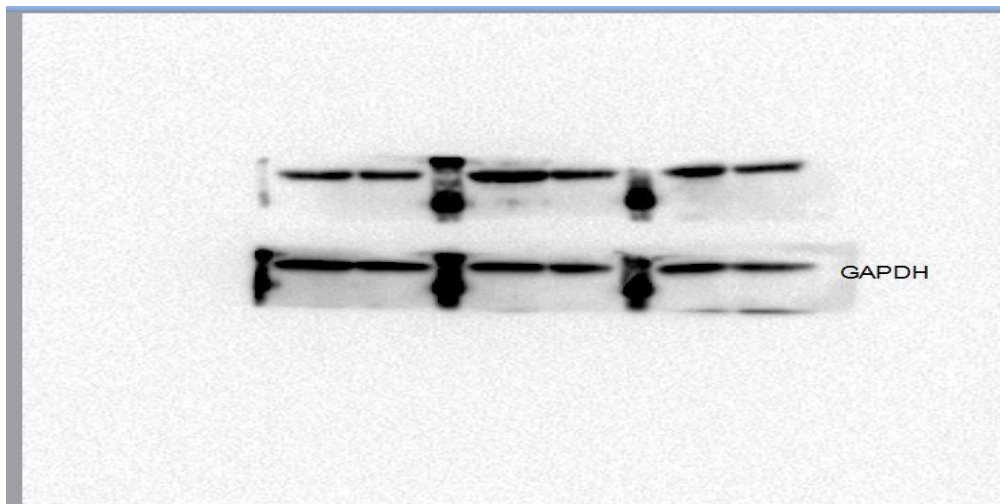

*GAPDH for Exp.1,2 &3*

Experiment No.1,2 &3

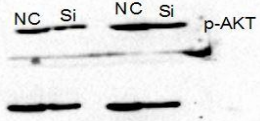

Exp.1,2 Expression of p-AKT in si-FAM129A transfected HEPG2

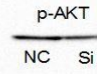

Exp.3 Expression of p-AKT in si-FAM129A transfected HEPG2

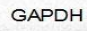

GAPDH for Exp.1,2 &3



B.

HCCLM3

Experiment No.1,2,&3

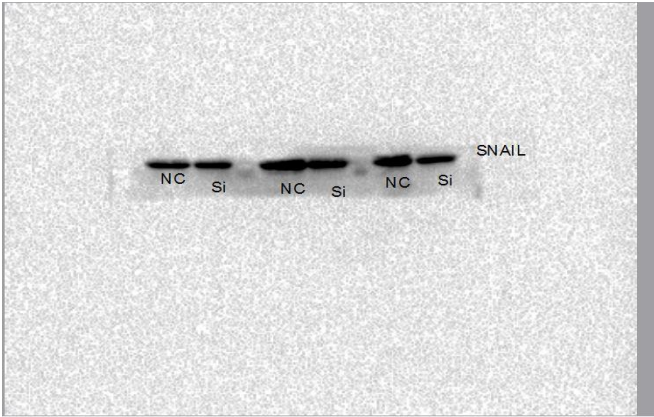

*Exp.1, 2, 3 Expression of SNAIL in si-FAM129A transfected LM3*

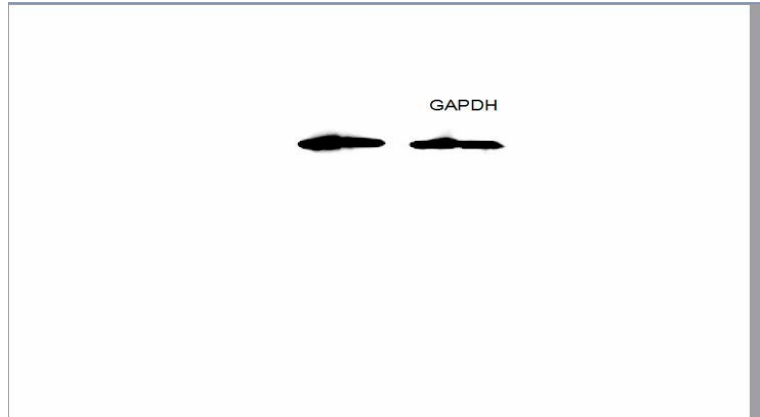

*GAPDH for Exp.1,2*

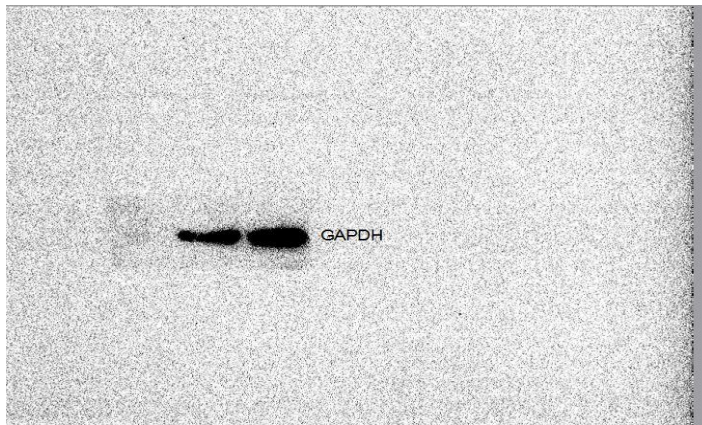

*GAPDH for Exp.3*

### Experiment No.1,2

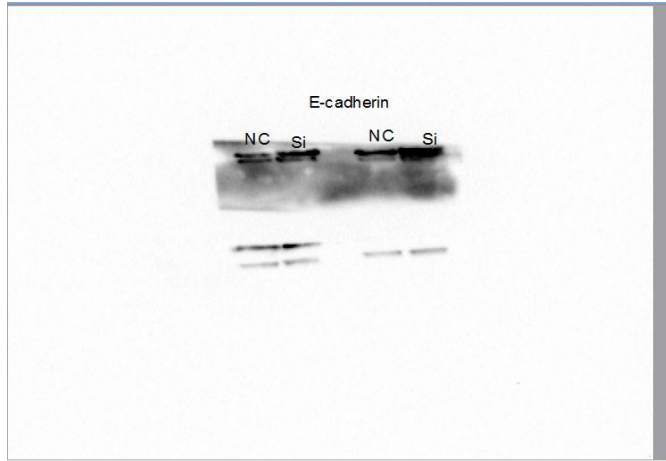

*Exp.1, 2 Expression of E-cadherin in si-FAM129A transfected LM3*

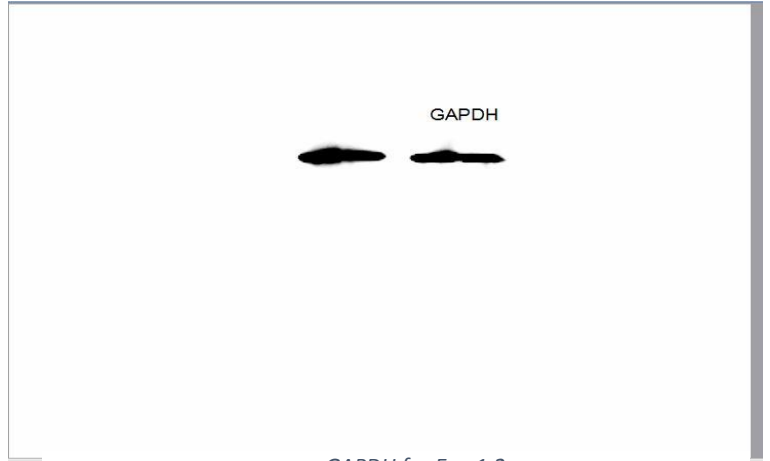

*GAPDH for Exp.1,2*

### Experiment No.3

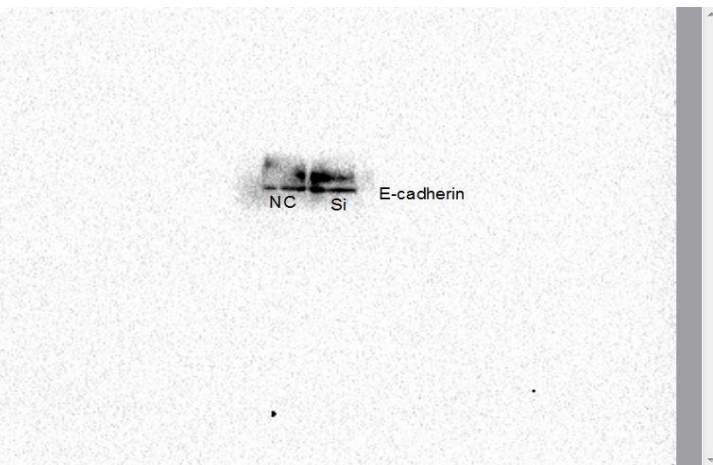

*Exp. 3 Expression of E-cadherin in si-FAM129A transfected LM3*

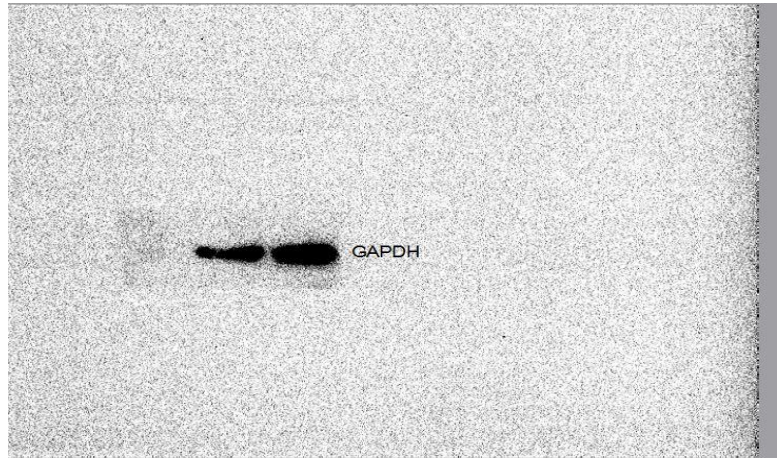

*GAPDH for Exp.3*



# Experiment No.1, 2 & 3

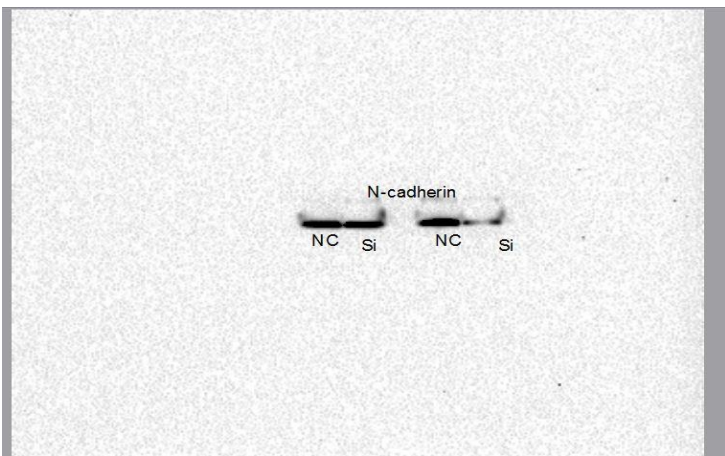

*Exp.1, 2 & 3 Expression of N-cadherin in si-FAM129A transfected LM3*

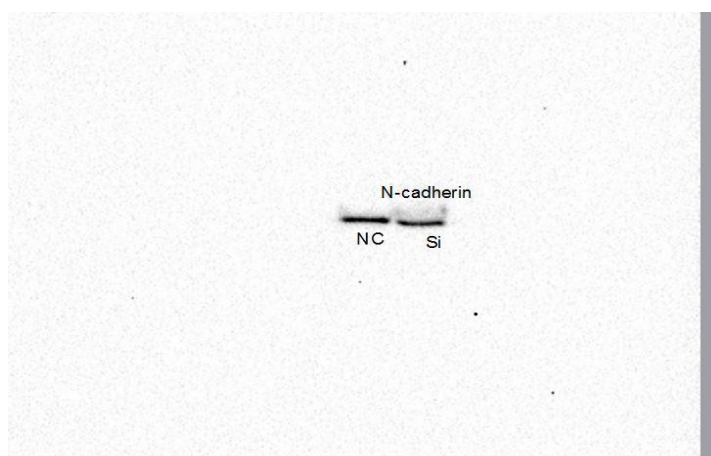

*Exp.3 Expression of N-cadherin in si-FAM129A transfected LM3*

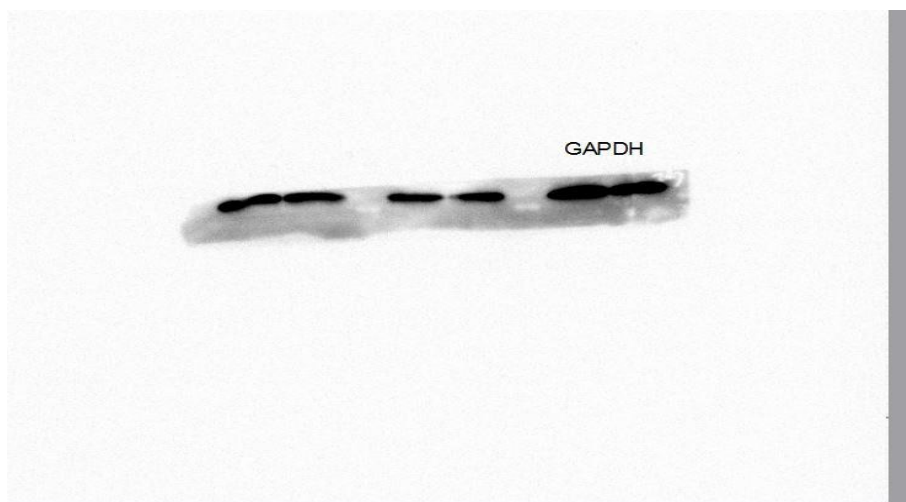

*GAPDH for Exp1,2 & .3*

Experiment No.1,2 &3

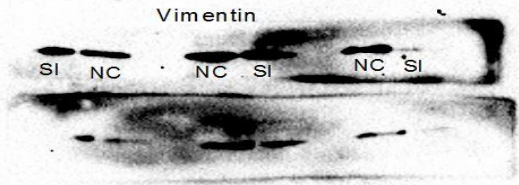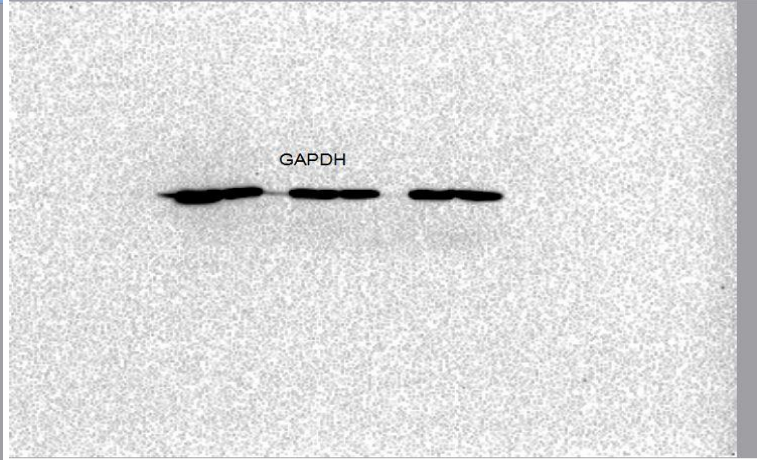

Exp.1, 2& 3 Expression of Vimentin in si-FAM129A transfected LM3

GAPDH for Exp1,2 & .3

B.

HepG2

Experiment No.1, 2 & 3

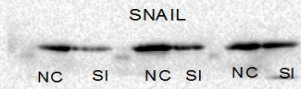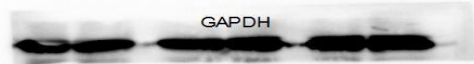

Exp.1, 2& 3 Expression of SNAIL in si-FAM129A transfected HEPG2

GAPDH for Exp1,2 & .3



## Experiment No.1, 2 & 3

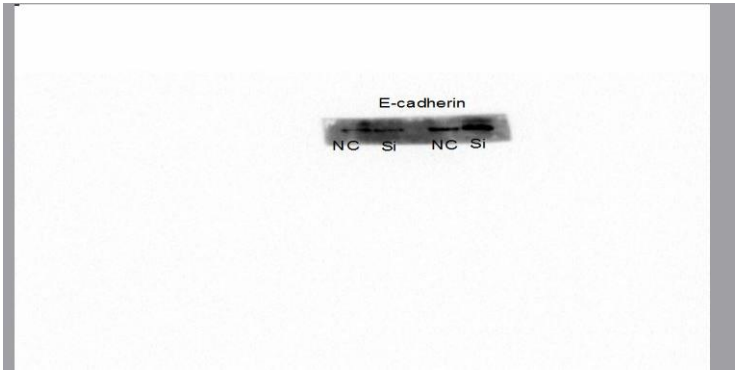

E-cadherin  
NC SI NC SI

*Exp.1, 2 Expression of E-cadherin in si-FAM129A transfected HEPG2*



E-cadherin  
NC SI

*Exp.3 Expression of E-cadherin in si-FAM129A transfected HEPG2*



GAPDH

*GAPDH for Exp1,2 & .3*

# Experiment No.1, 2 & 3

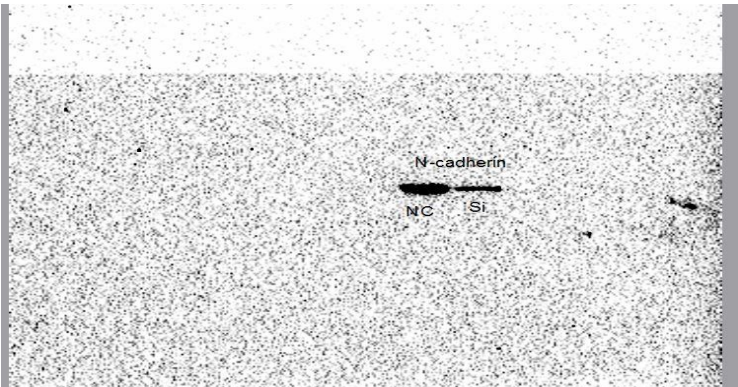

Exp.1 Expression of N-cadherin in si-FAM129A transfected HEPG2

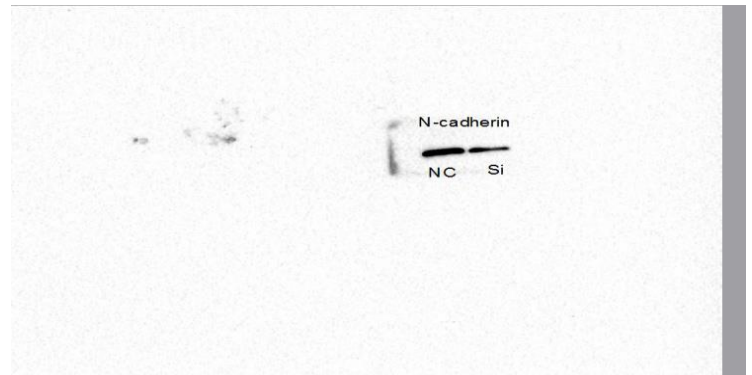

Exp.2 Expression of N-cadherin in si-FAM129A transfected HEPG2

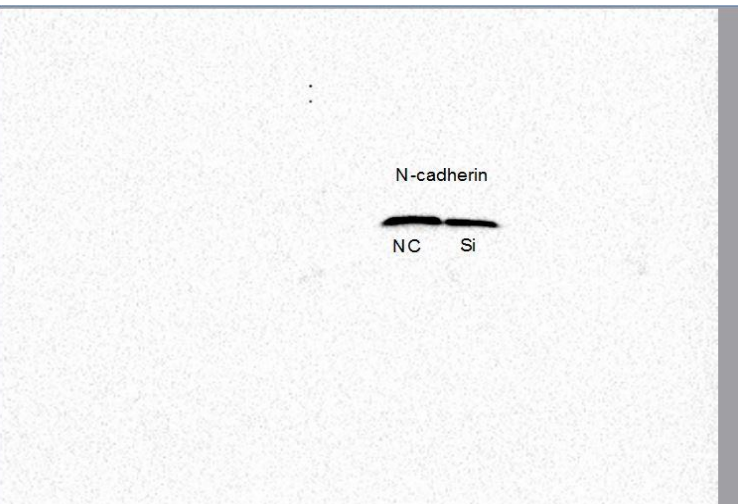

Exp.3 Expression of N-cadherin in si-FAM129A transfected HEPG2

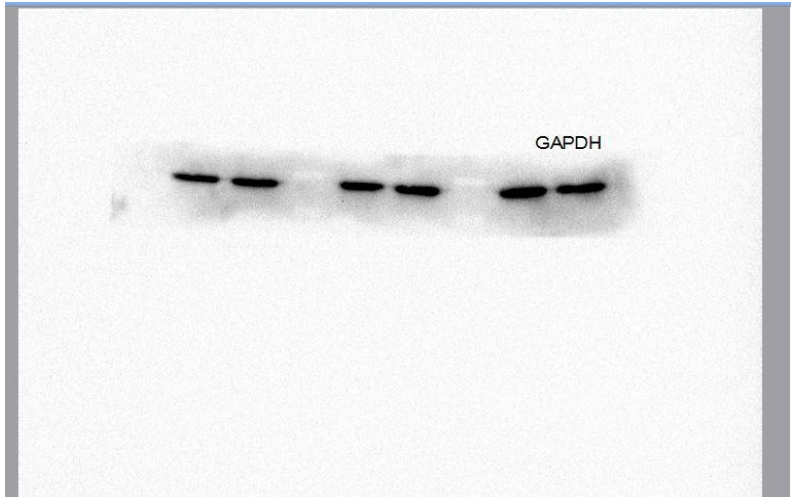

GAPDH for Exp1,2 & .3



## Experiment No.1, 2 & 3

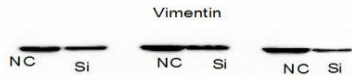

Exp.1,2 & 3 Expression of Vimentin in si-FAM129A transfected HEPG2

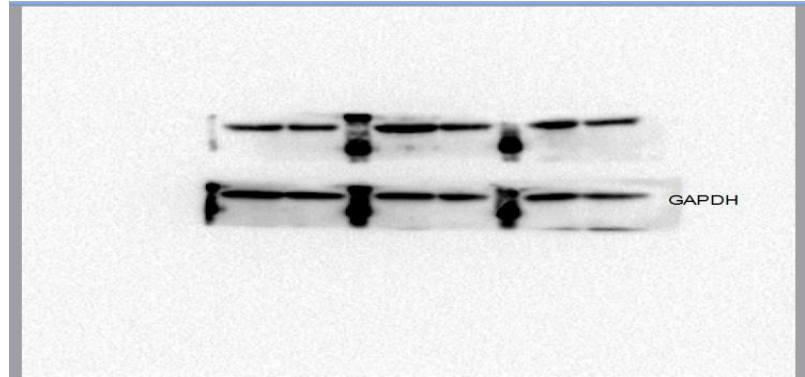

GAPDH for Exp1,2 & .3

C.

HCCLM3

Experiment No.1,2 &3

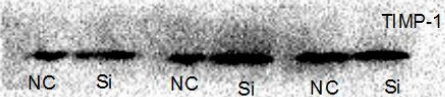

Exp.1, 2&3 Expression of TIMP-1 in si-FAM129A transfected LM3

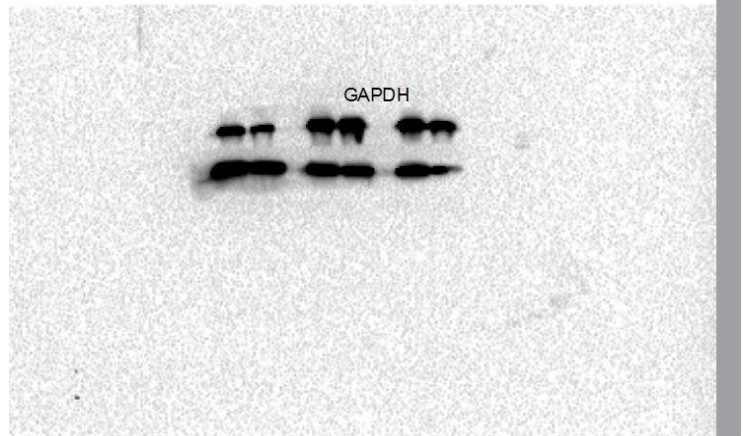

GAPDH foe Exp.1,2,3

Experiment No.1, 2 &3

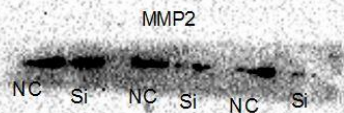

MMP2

NC Si NC Si NC Si

Exp:1,2 &3 Expression of MMP2 in si-FAM129A transfected LM3



GAPDH

GAPDH for Exp.1,2& 3

Experiment No.1, 2 &3

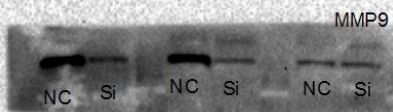

MMP9

NC Si NC Si NC Si

Exp; 1, 2&3 Expression of MMP9 in si-FAM129A transfected LM3



GAPDH

GAPDH for Exp 1,2,3



C.

HepG2

Experiment No.1, 2

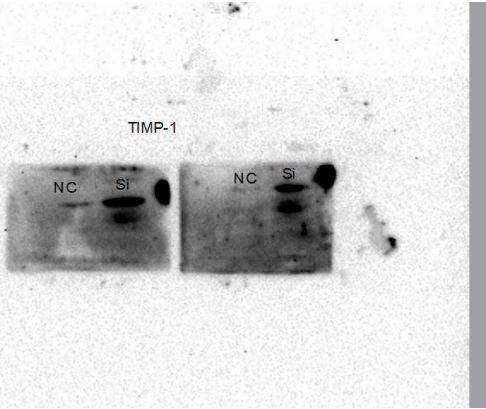

Exp.1,2 Expression of TIMP-1 in si-FAM129A transfected HEPG2

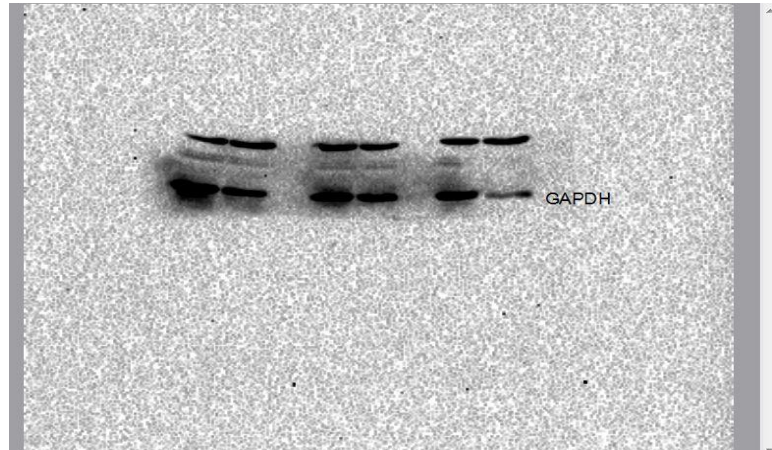

GAPDH for Exp1,2

Experiment No.3

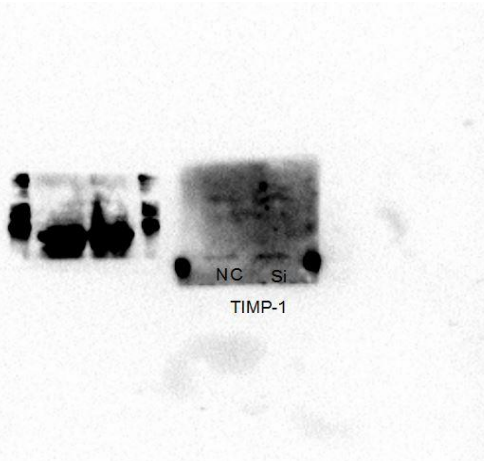

Exp.3 Expression of TIMP-1 in si-FAM129A transfected HEPG2

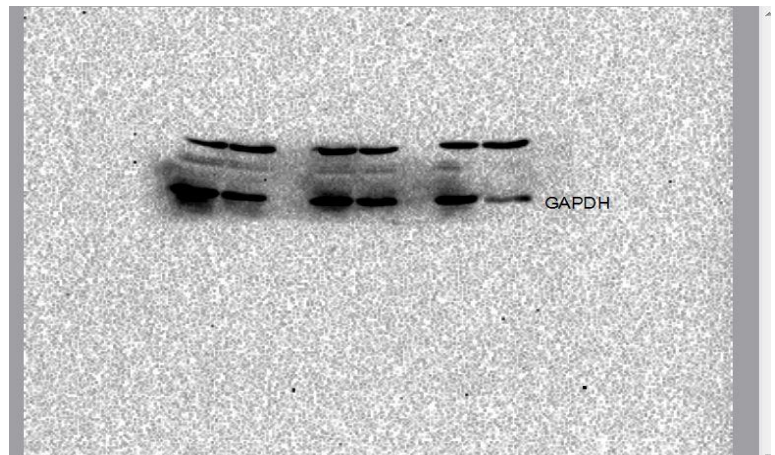

GAPDH for Exp.3

## Experiment No.1,2 &3

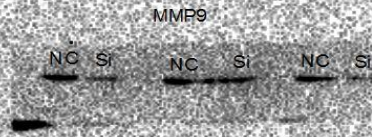

Exp.1,2 &3 Expression of MMP9 in si-FAM129A transfected HEPG2

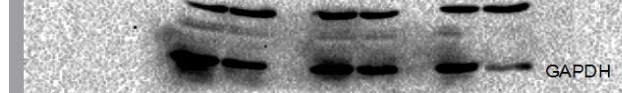

GAPDH for Exp.1,2,3



Experiment No.1,2 &3

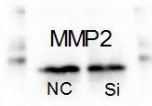

Exp.1 Expression of MMP2 in si-FAM129A transfected HEPG2

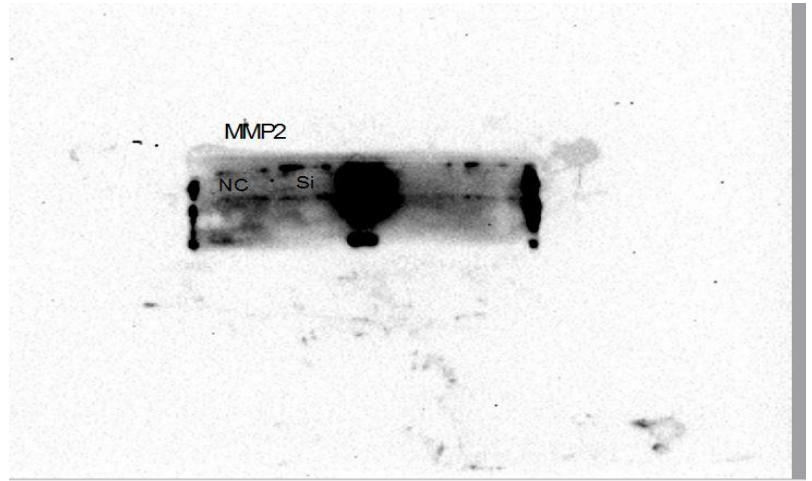

Exp.2 Expression of MMP2 in si-FAM129A transfected HEPG2

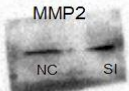

Exp.3 Expression of MMP2 in si-FAM129A transfected HEPG2

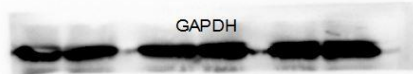

GAPDH for Exp.1,2,3

C.

HCCLM3

Experiment No.1,2 &3

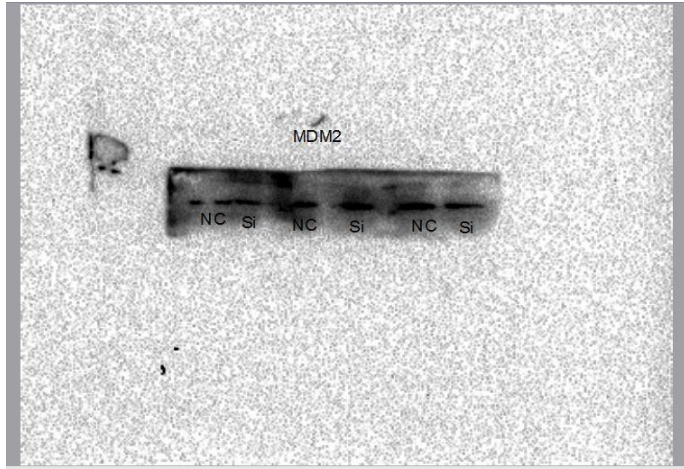

*Exp.1,2 &3 Expression of MDM2 in si-FAM129A transfected LM3*

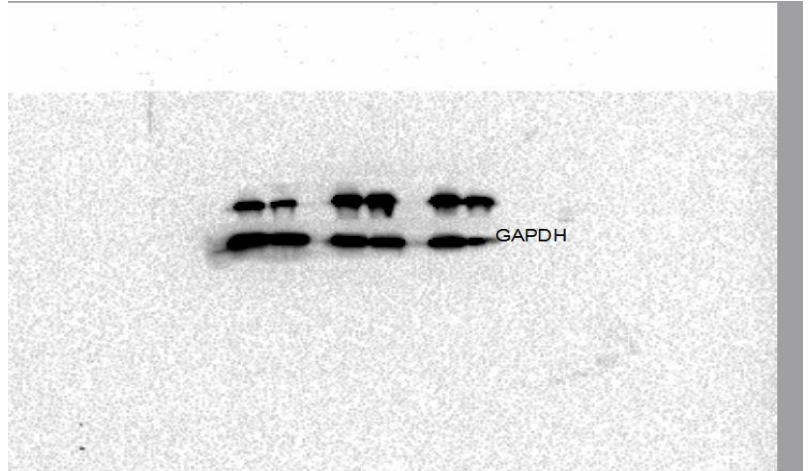

*GAPDH for Exp.1,2,3*

Experiment No.1,2 &3

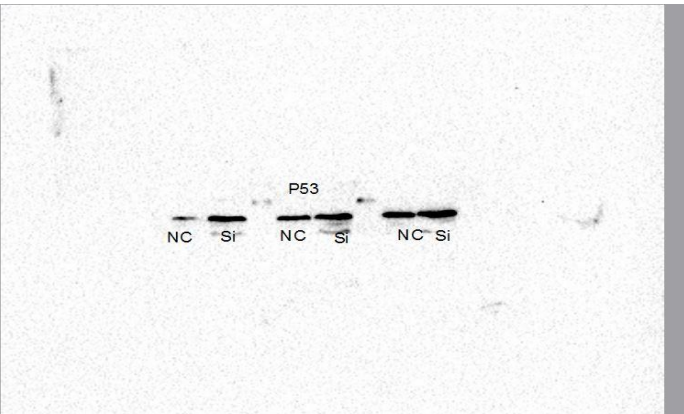

*Exp.1,2 &3 Expression of P53 in si-FAM129A transfected LM3*

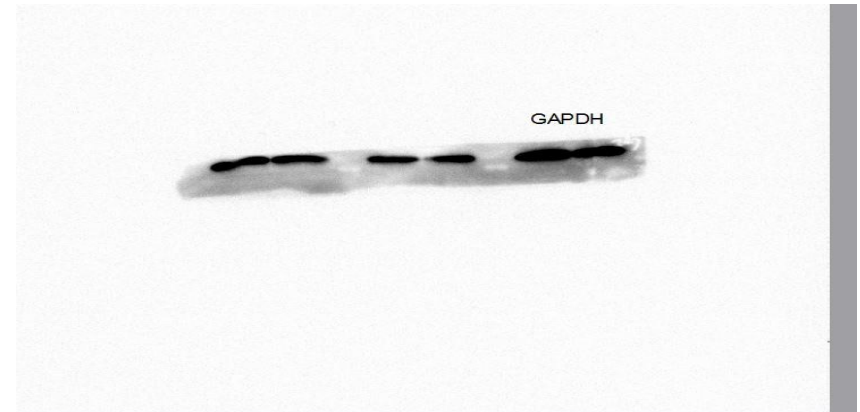

*GAPDH for Exp.1,2,3*

Experiment No.1,2 &3

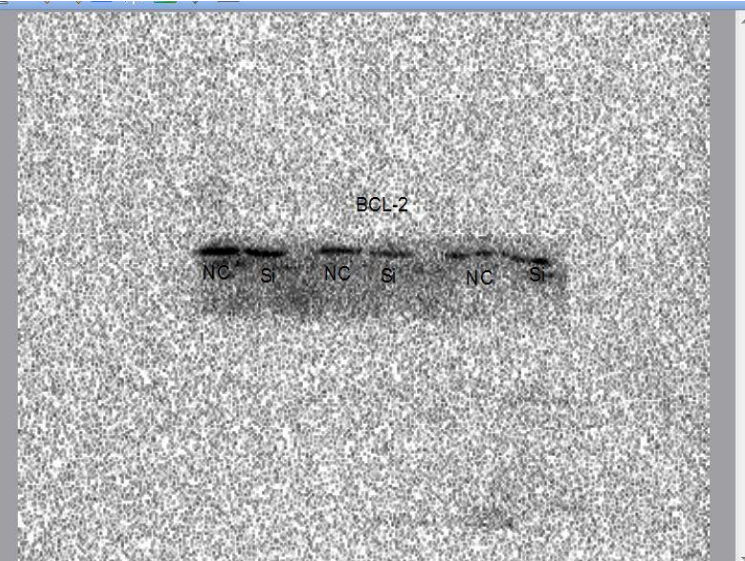

Exp.1,2 &3 Expression of BCL-2 in si-FAM129A transfected LM3

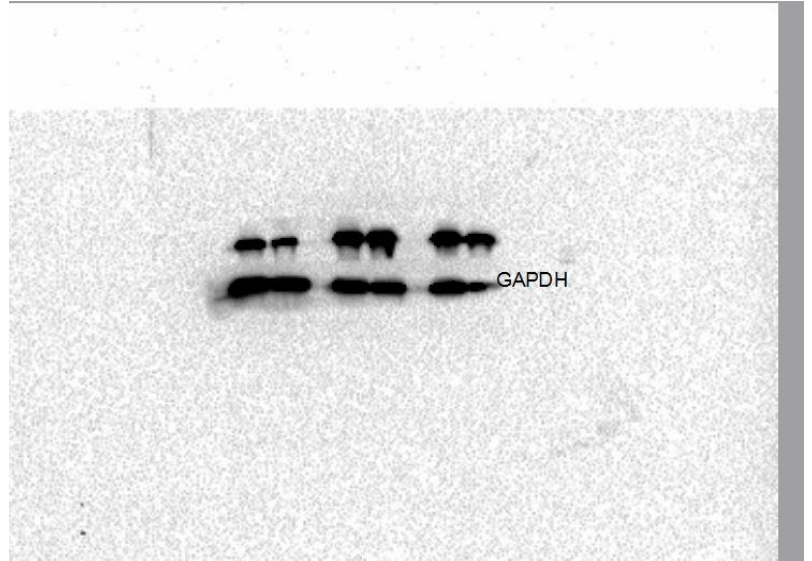

GAPDH for Exp.1,2,3

Experiment No.1,2 &3

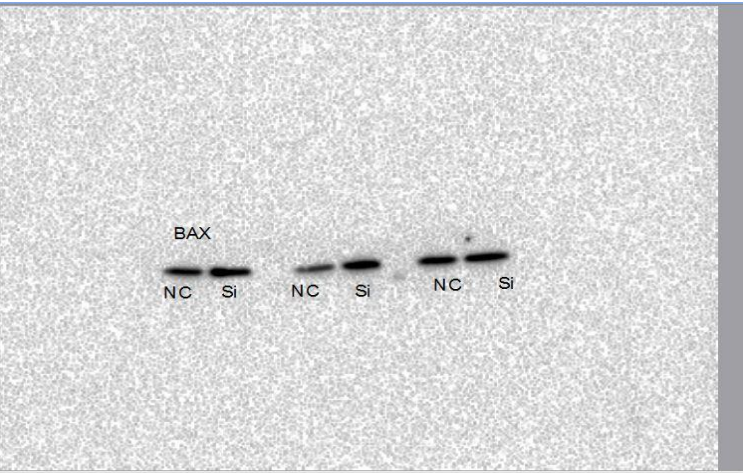

Exp. 1,2 &3 Expression of BAX in si-FAM129A transfected LM3

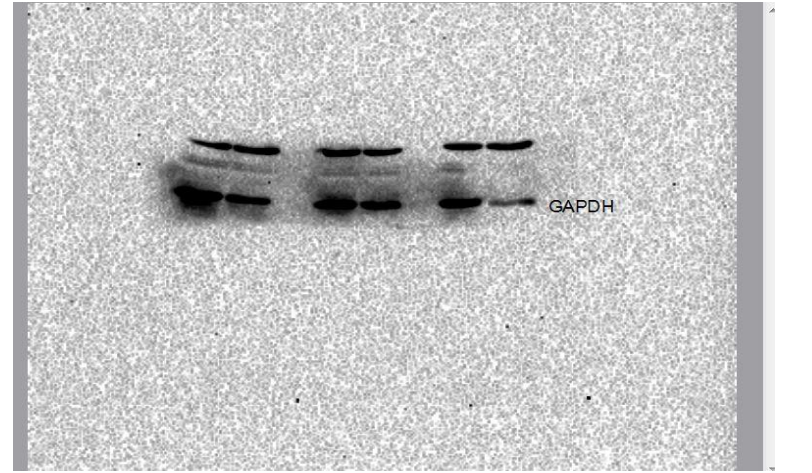

GAPDH for Exp.1,2,3



C.

HEPG2

Experiment No.1,2 &3

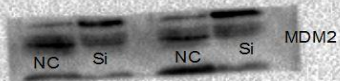

*Exp. 1,2 Expression of MDM2 in si-FAM129A transfected HEPG2*

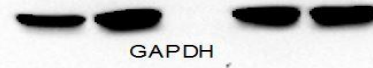

*GAPDH for Exp.1,2*

Experiment No.3

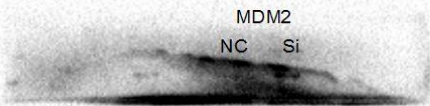

*Exp. 3 Expression of MDM2 in si-FAM129A transfected HEPG2*

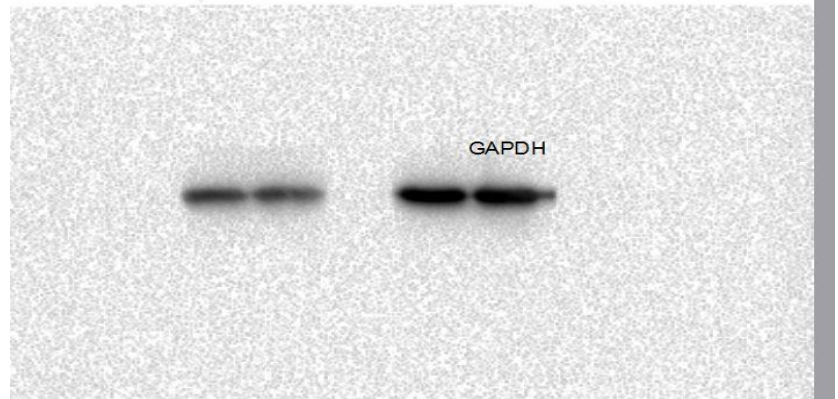

*GAPDH for Exp.3*

## Experiment No.1,2& 3

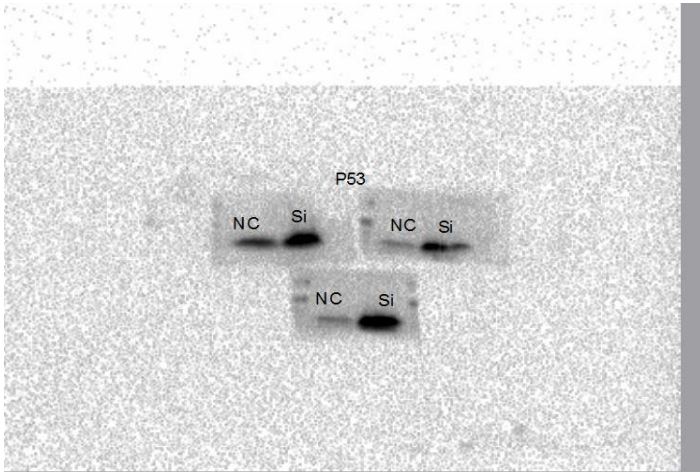

*Exp. 1,2 &3 Expression of P53 in si-FAM129A transfected HEPG2*

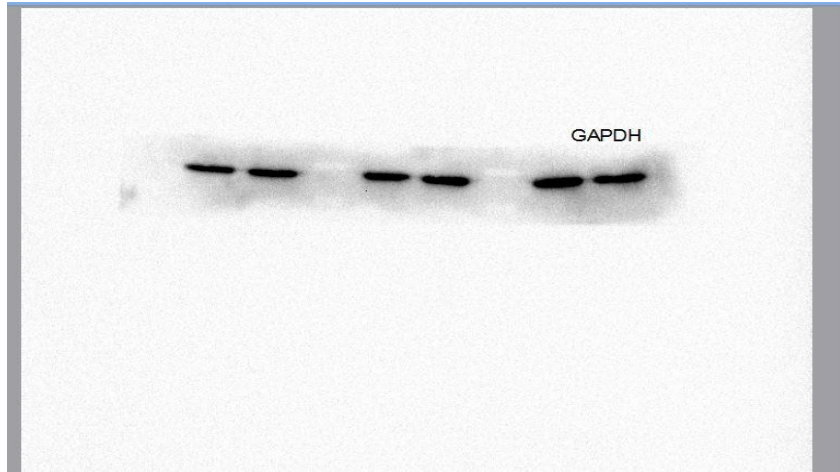

*GAPDH for Exp.1,2,3*

## Experiment No.1, 2

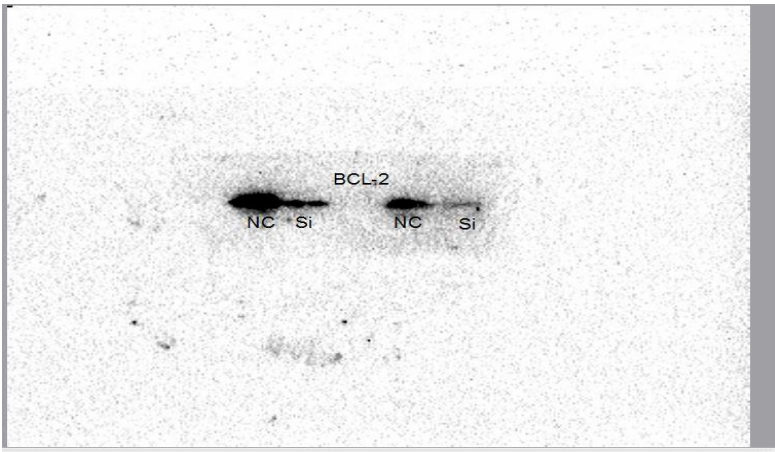

*Exp. 1,2 Expression of BCL-2 in si-FAM129A transfected HEPG2*

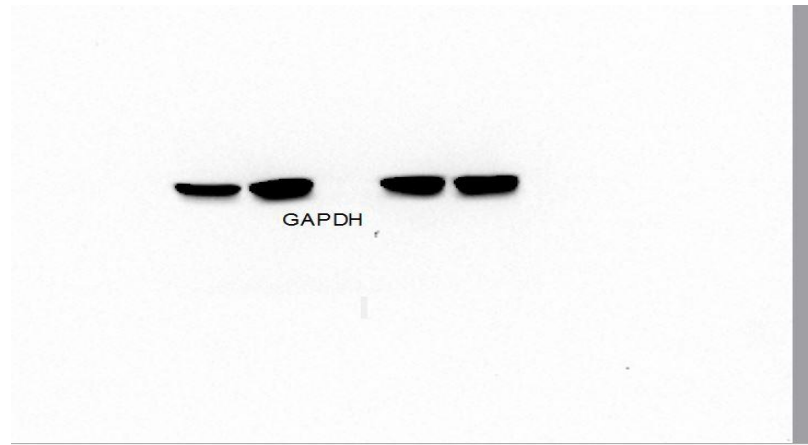

*GAPDH for Exp.1,2*

### Experiment No.3

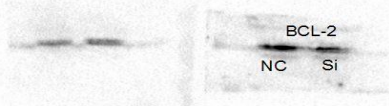

Exp. 3 Expression of BCL-2 in si-FAM129A transfected HEPG2

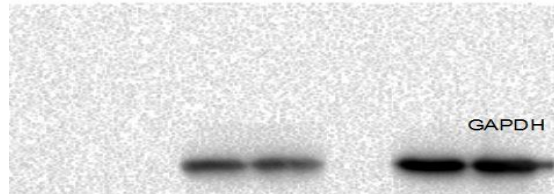

GAPDH for Exp.3

### Experiment No.1, 2 & 3

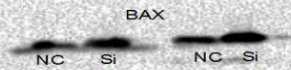

Exp. 1,2 Expression of BAX in si-FAM129A transfected HEPG2

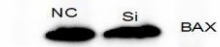

Exp 3 Expression of BAX in si-FAM129A transfected HEPG2

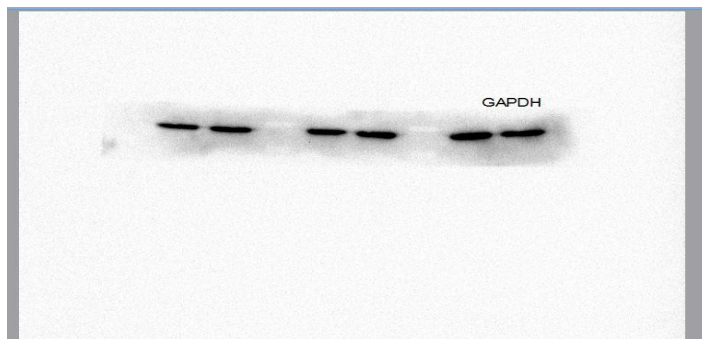

GAPDH for Exp.1,2,3



D.

HCCLM3

Experiment No.1,2 &3

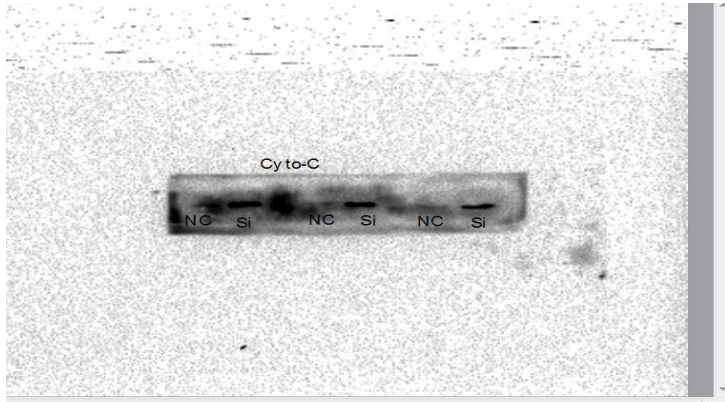

Exp. 1,2,3 Expression of Cytochrome-C in si-FAM129A transfected LM3

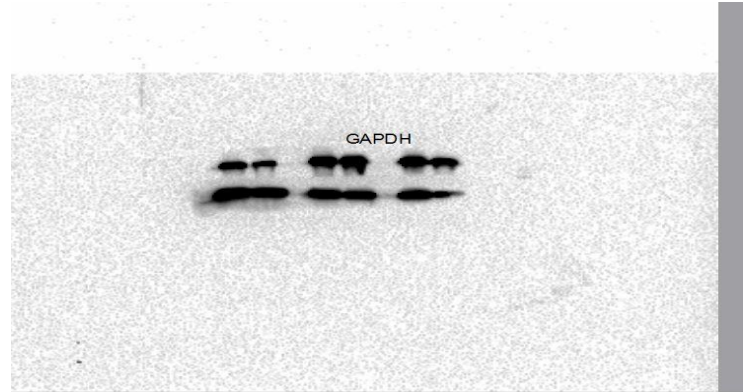

GAPDH for Exp.1,2,3

Experiment No.1, 2 &3

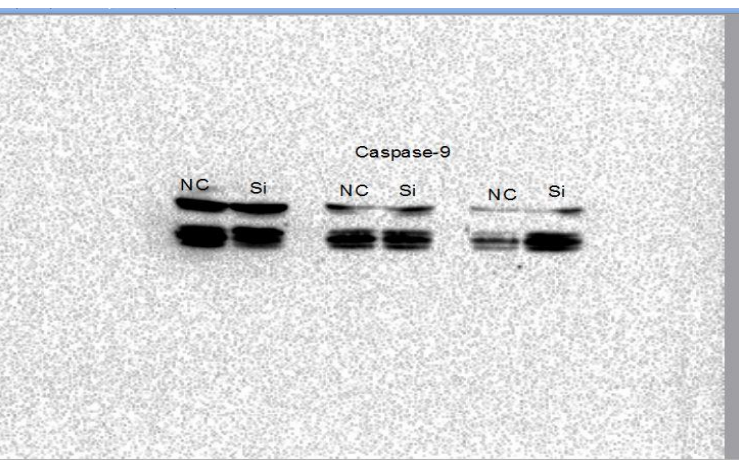

Exp. 1,2 &3 Expression of Caspase-9 in si-FAM129A transfected LM3

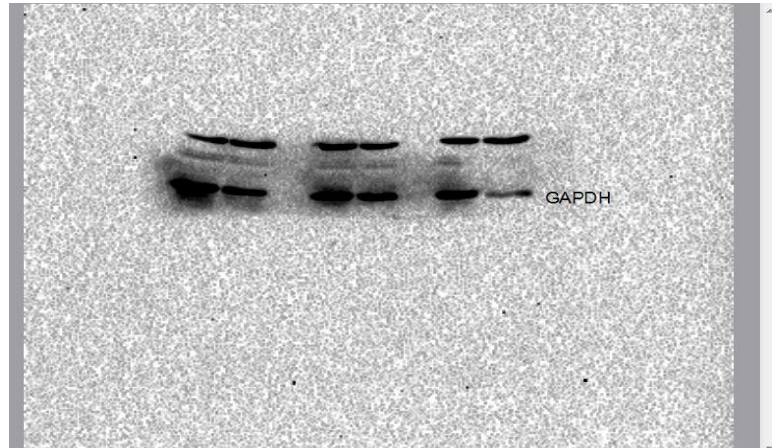

GAPDH for Exp.1,2,3

Experiment No.1, 2 & 3

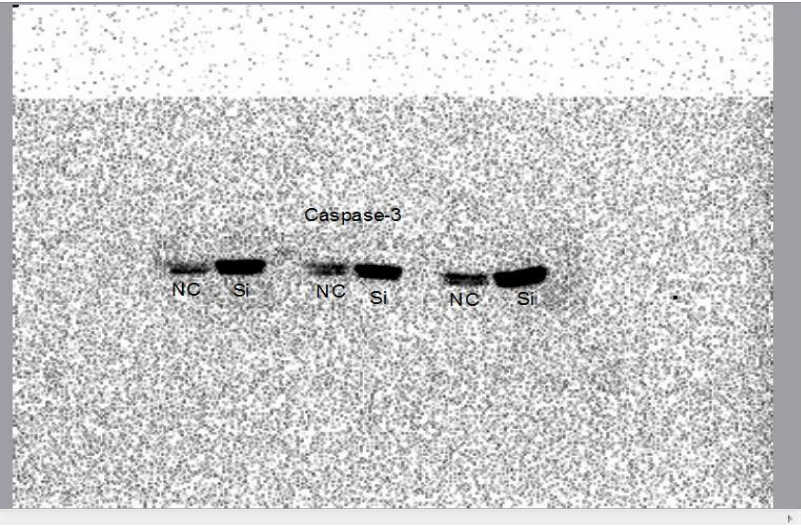

Exp. 1, 2& 3 Expression of Caspase-3 in si-FAM129A transfected LM3

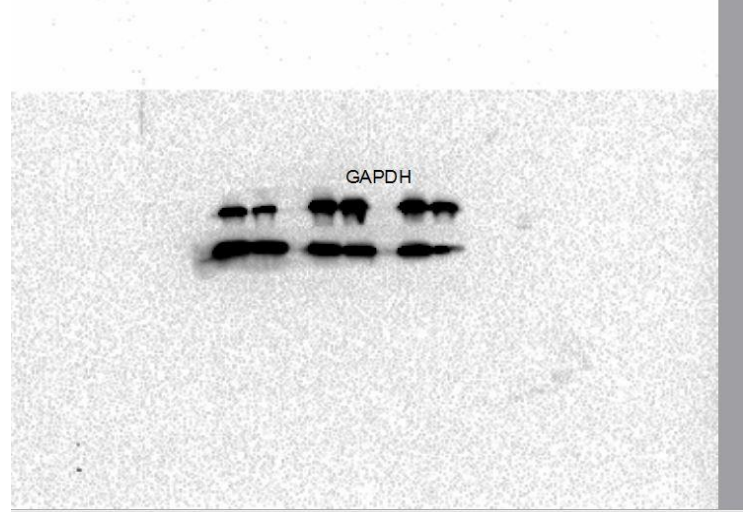

GAPDH for Exp.1,2,3

D.

HEPG2

Experiment No.1, 2 &3

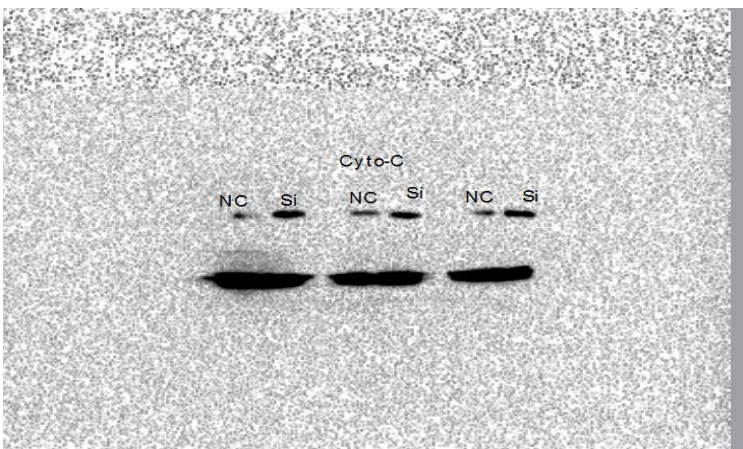

Exp. 1,2& 3 Expression of Cytochrome-C in si-FAM129A transfected HEPG2

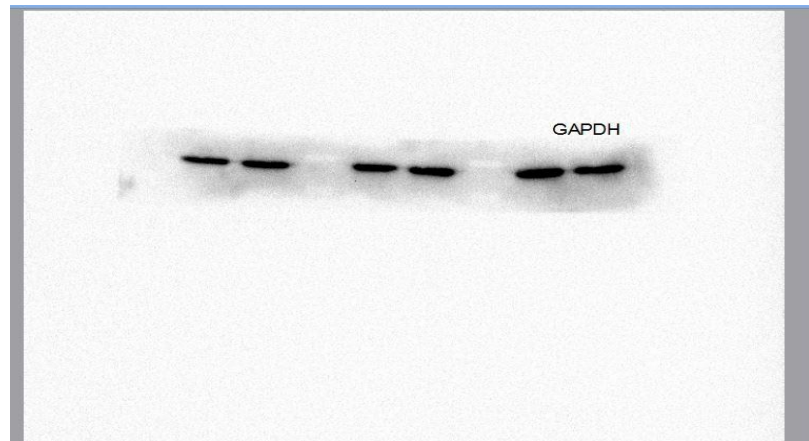

GAPDH for Exp.1,2,3



### Experiment No.1, 2

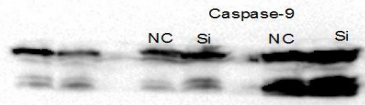

Exp. 1,2 Expression of Caspase-9 in si-FAM129A transfected HEPG2

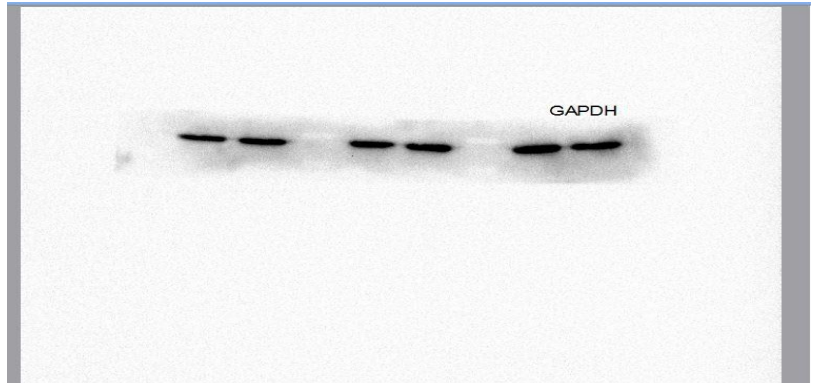

GAPDH for Exp.1,2,

### Experiment No.3

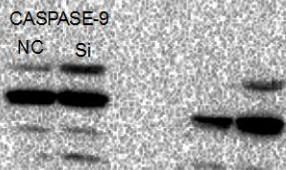

Exp. 3 Expression of Caspase-9 in si-FAM129A transfected HEPG2

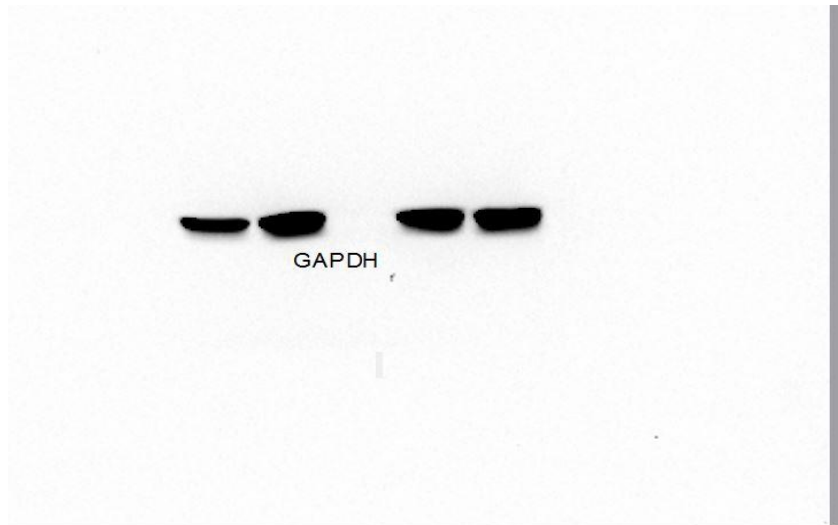

GAPDH for Exp.3



### Experiment No.1, 2

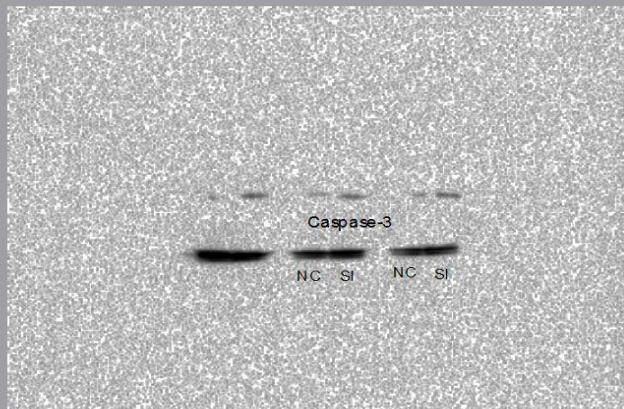

*Exp. 1,2 Expression of Caspase-3 in si-FAM129A transfected HEPG2*

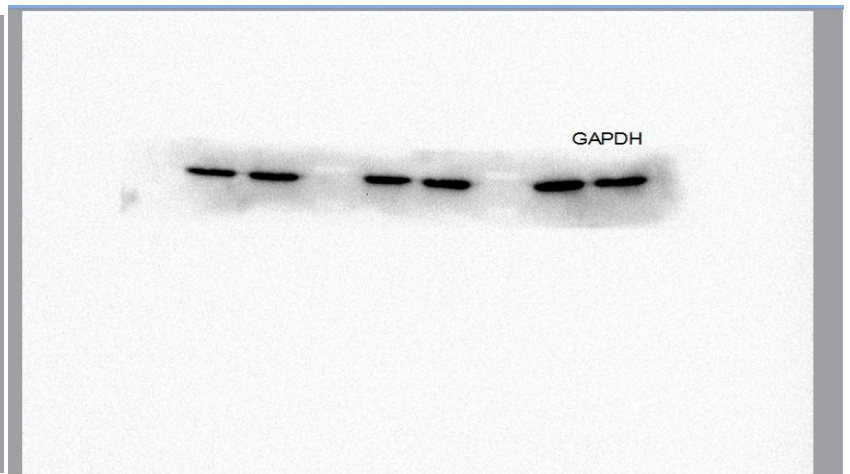

*GAPDH for Exp.1,2*

### Experiment No.3

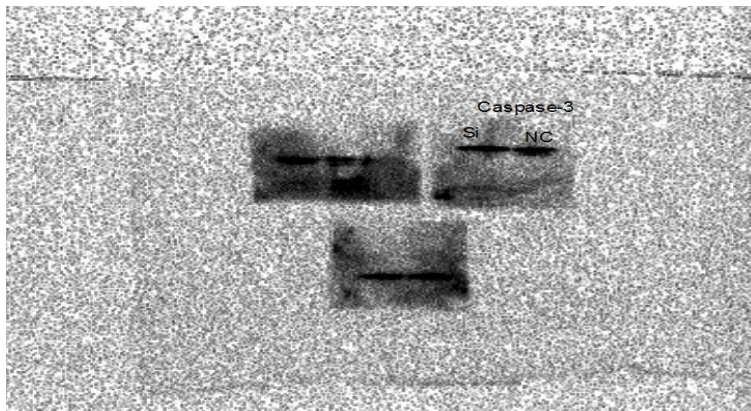

*Exp. 3 Expression of Caspase-3 in si-FAM129A transfected HEPG2*

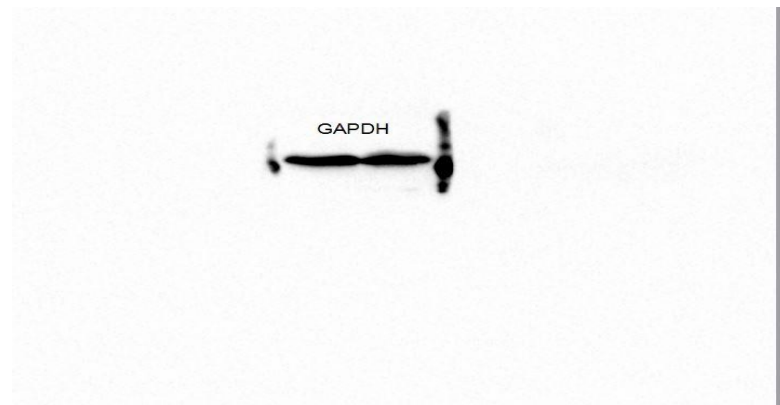

*GAPDH for Exp.3*
